# Supplementary material
Source: PubMed Central journal article supplement (PMC3871187)

# SCF-mediated degradation of p100: Mechanisms and relevance in multiple myeloma

Michele Pagano  
Howard Hughes Medical Institute  
New York University School of Medicine  
NYU Cancer Institute

# The hierarchy of the ubiquitin system

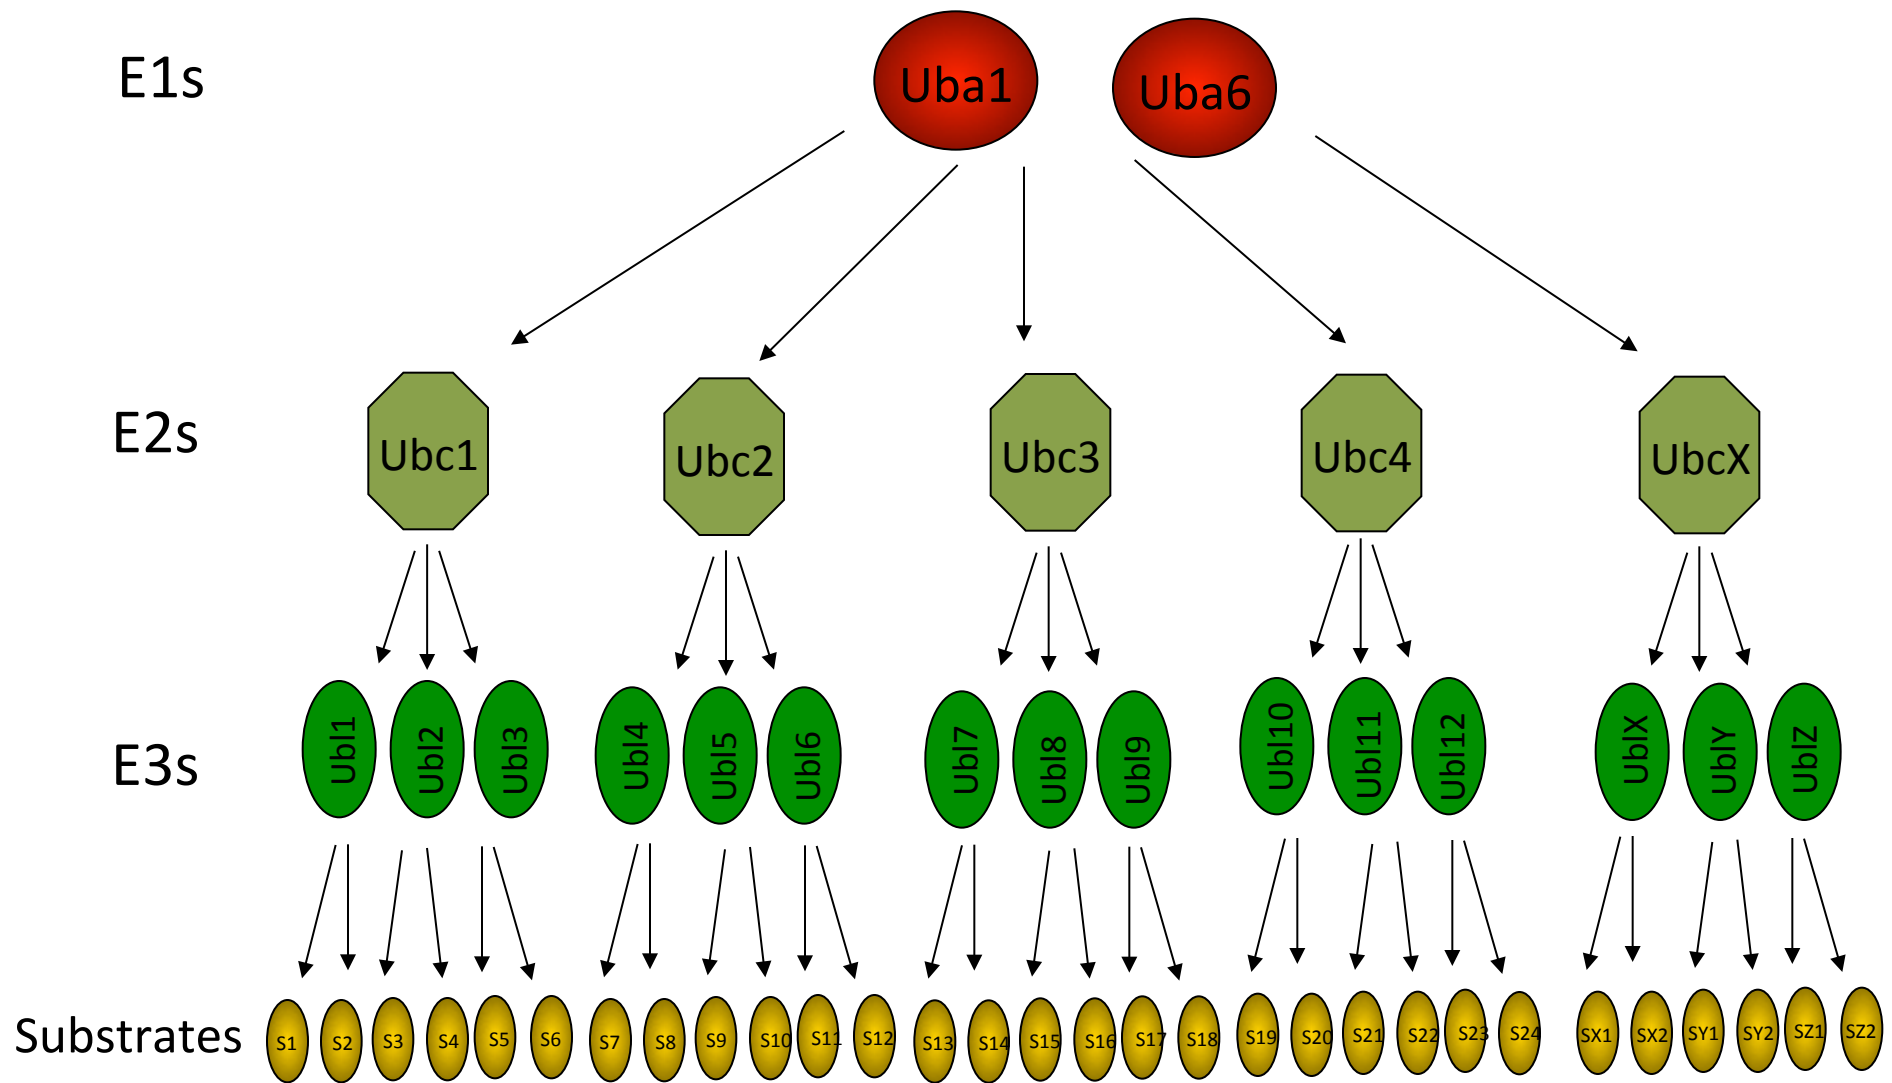

# The SCF ubiquitin ligase complex

---

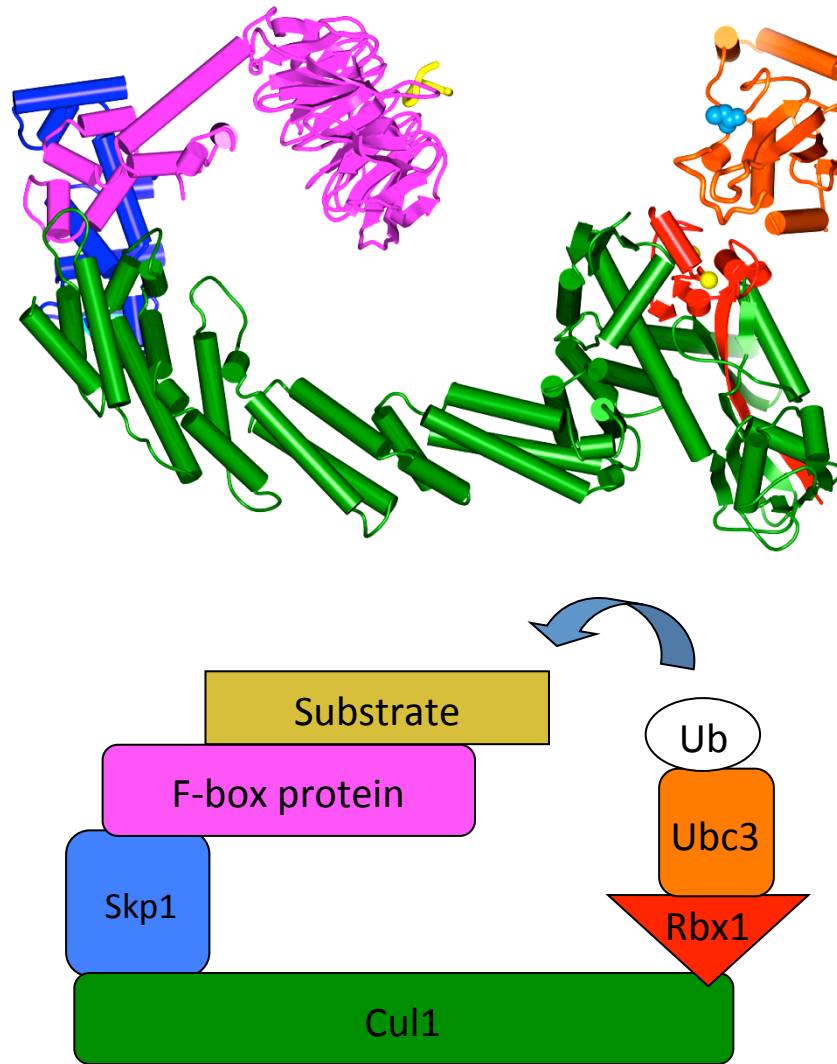

# Four major families of Cullin-RING ubiquitin Ligase complexes (CRLs) (> 200 different enzymes with different substrate receptors)

---

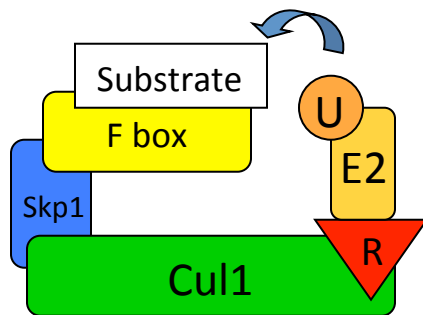

69 F-box proteins = 69 SCF ligases

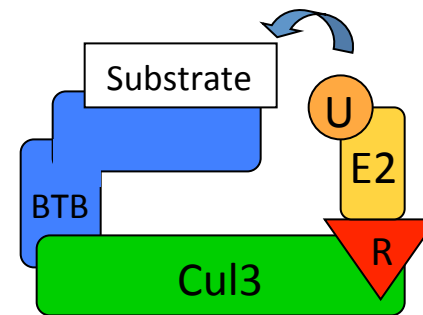

~100 BTB proteins = ~100 CRL3 ligases

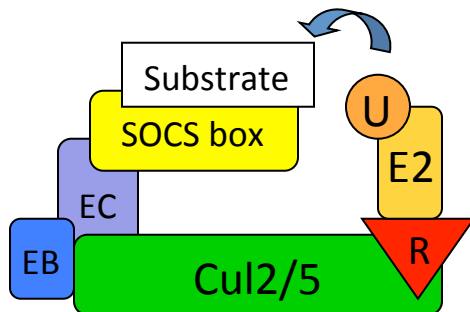

~50 SOCS-box proteins = ~50 CRL2/5 ligases

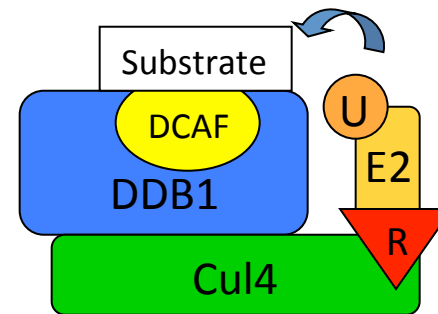

~30 DCAF proteins = ~30 CRL4 ligases

SCF and the SCF-like ligase APC/C control a variety of key cellular functions, including gene transcription, protein synthesis, DNA damage responses, chromosome stability, centrosome duplication, dNTP synthesis, apoptosis, circadian clock oscillation, *etc.*

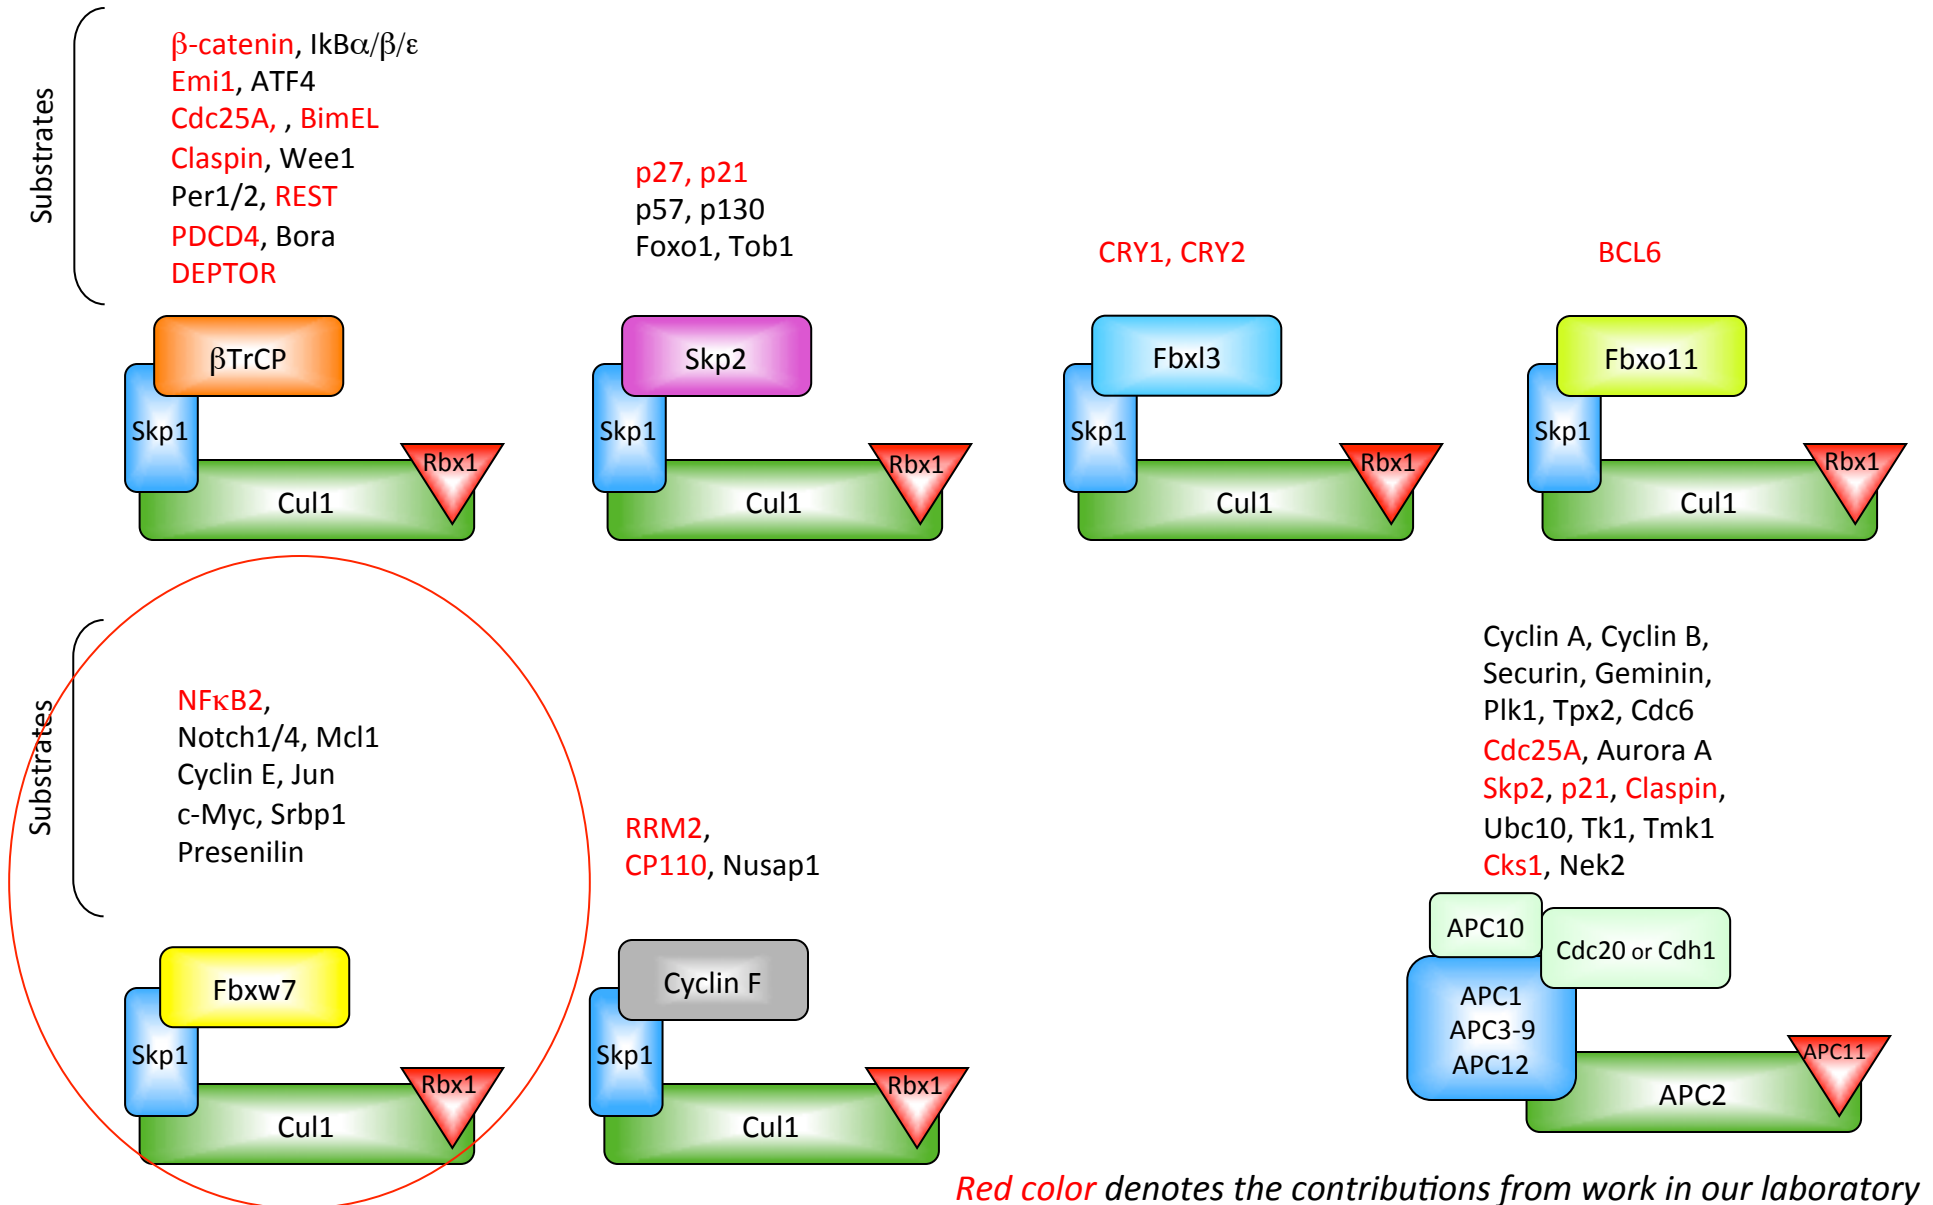

## The best characterized substrates of Fbxw7

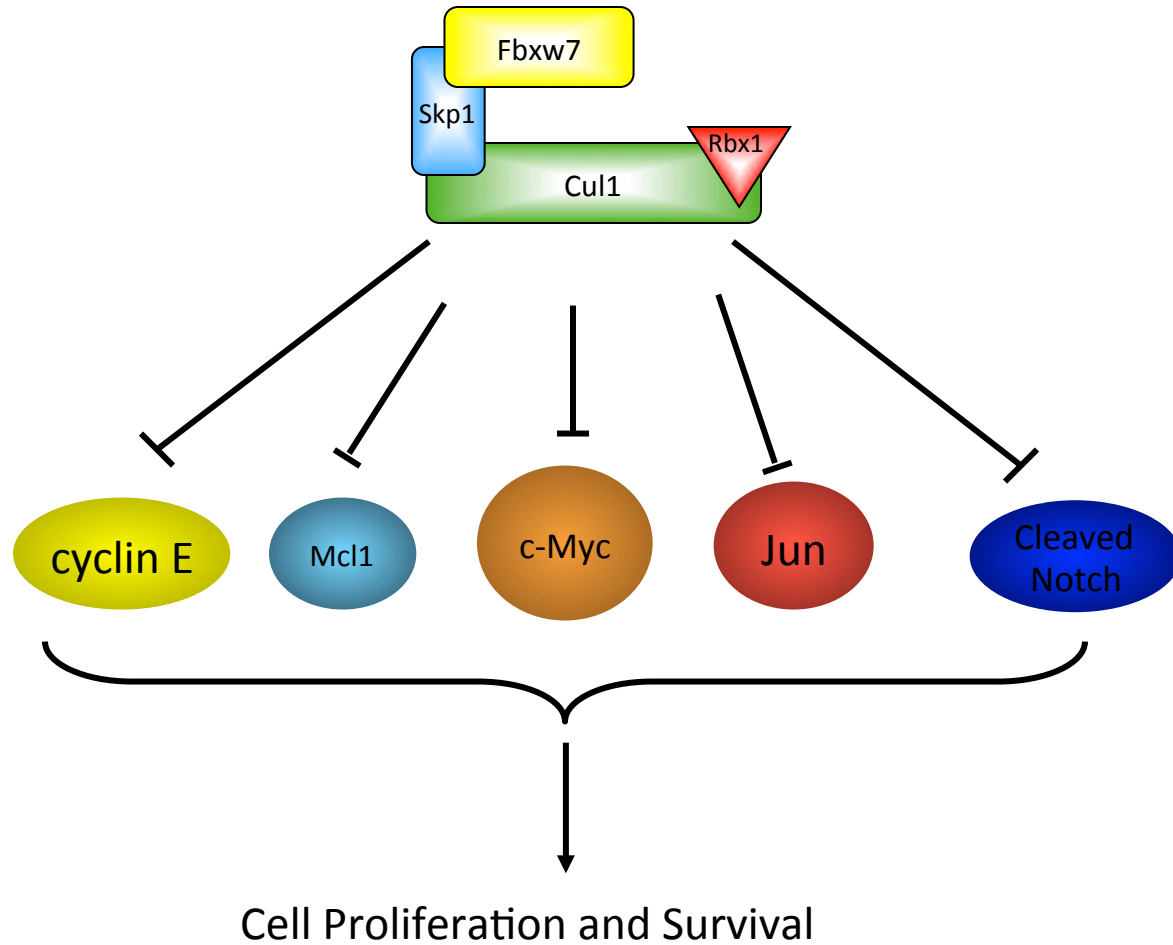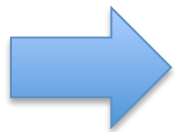

A novel function of Fbxw7 as a pro-survival gene in diseases with elevated NF- $\kappa$ B activity

## Differential purification strategy: Utilizing an Fbxw7 $\alpha$ mutant deficient in substrate binding

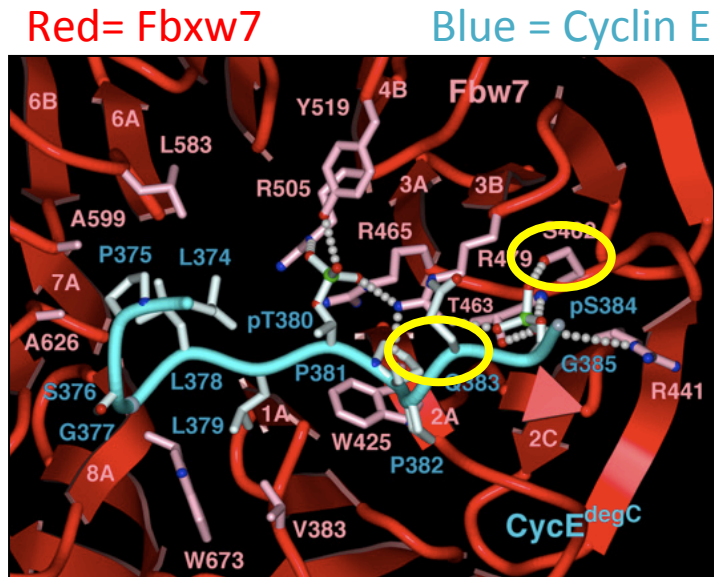

Hao et al. *Molecular Cell* 2007

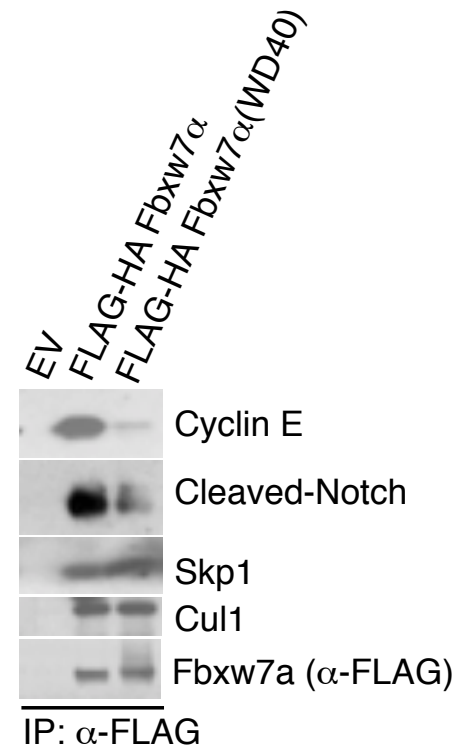

- Mutation of these residues to Ala [Fbxw7 (WD40)] impairs binding to known substrates
- S462/T463/R465 are critical residues on Fbxw7 for binding to substrates

Differential purification strategy: Utilizing an Fbxw7 $\alpha$  mutant deficient in substrate binding

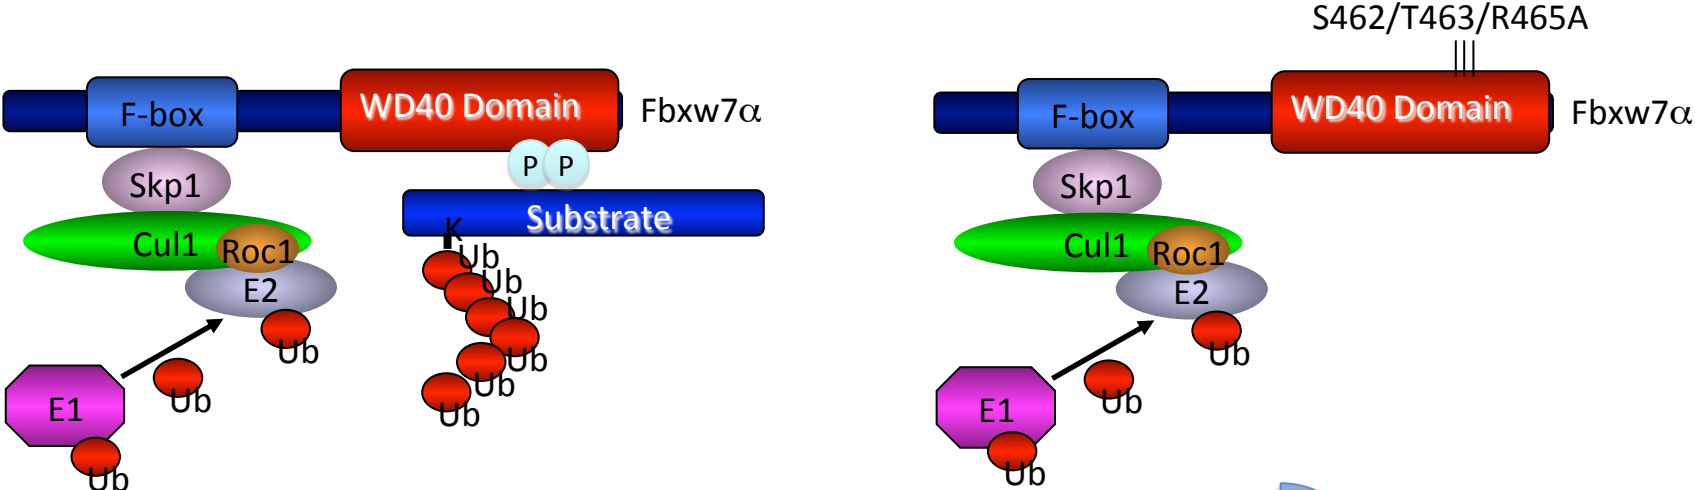

Affinity chromatography methods

Identification of proteins LC/MS Orbitrap

Peptide Subtraction (WT - WD40mut)

Validation of novel substrates



## Differential purification identifies p100 as a putative Fbxw7 substrate

---

|                                                                  | WT | WD40 |
|------------------------------------------------------------------|----|------|
| SCF Accessory Factors<br>( <i>e.g.</i> , Skp1, Cul1, Rbx1, Ubc3) | +  | +    |
| Substrates ( <i>e.g.</i> , Myc, Notch)                           | +  | -    |
| Chaperones/Other<br>Regulators, Adapters etc.                    | +  | +    |

### *Normalized Spectral Abundance (Mass Spectrometry)*

| Protein     | FBXW7<br>single IP | FBXW7-<br>WD40<br>mutant<br>single IP | FBXW7<br>Double IP | FBXW7-<br>WD40<br>mutant<br>Double IP |
|-------------|--------------------|---------------------------------------|--------------------|---------------------------------------|
| Fbxw7       | 0.0443             | 0.0415                                | 0.0889             | 0.0902                                |
| Skp1        | 0.0428             | 0.052                                 | 0.0842             | 0.0596                                |
| Cul1        | 0.0006             | 0.0015                                | 0.0088             | 0.0069                                |
| <b>p100</b> | 0.0002             | 0                                     | 0.0005             | 0                                     |

# The NF- $\kappa$ B Family of proteins

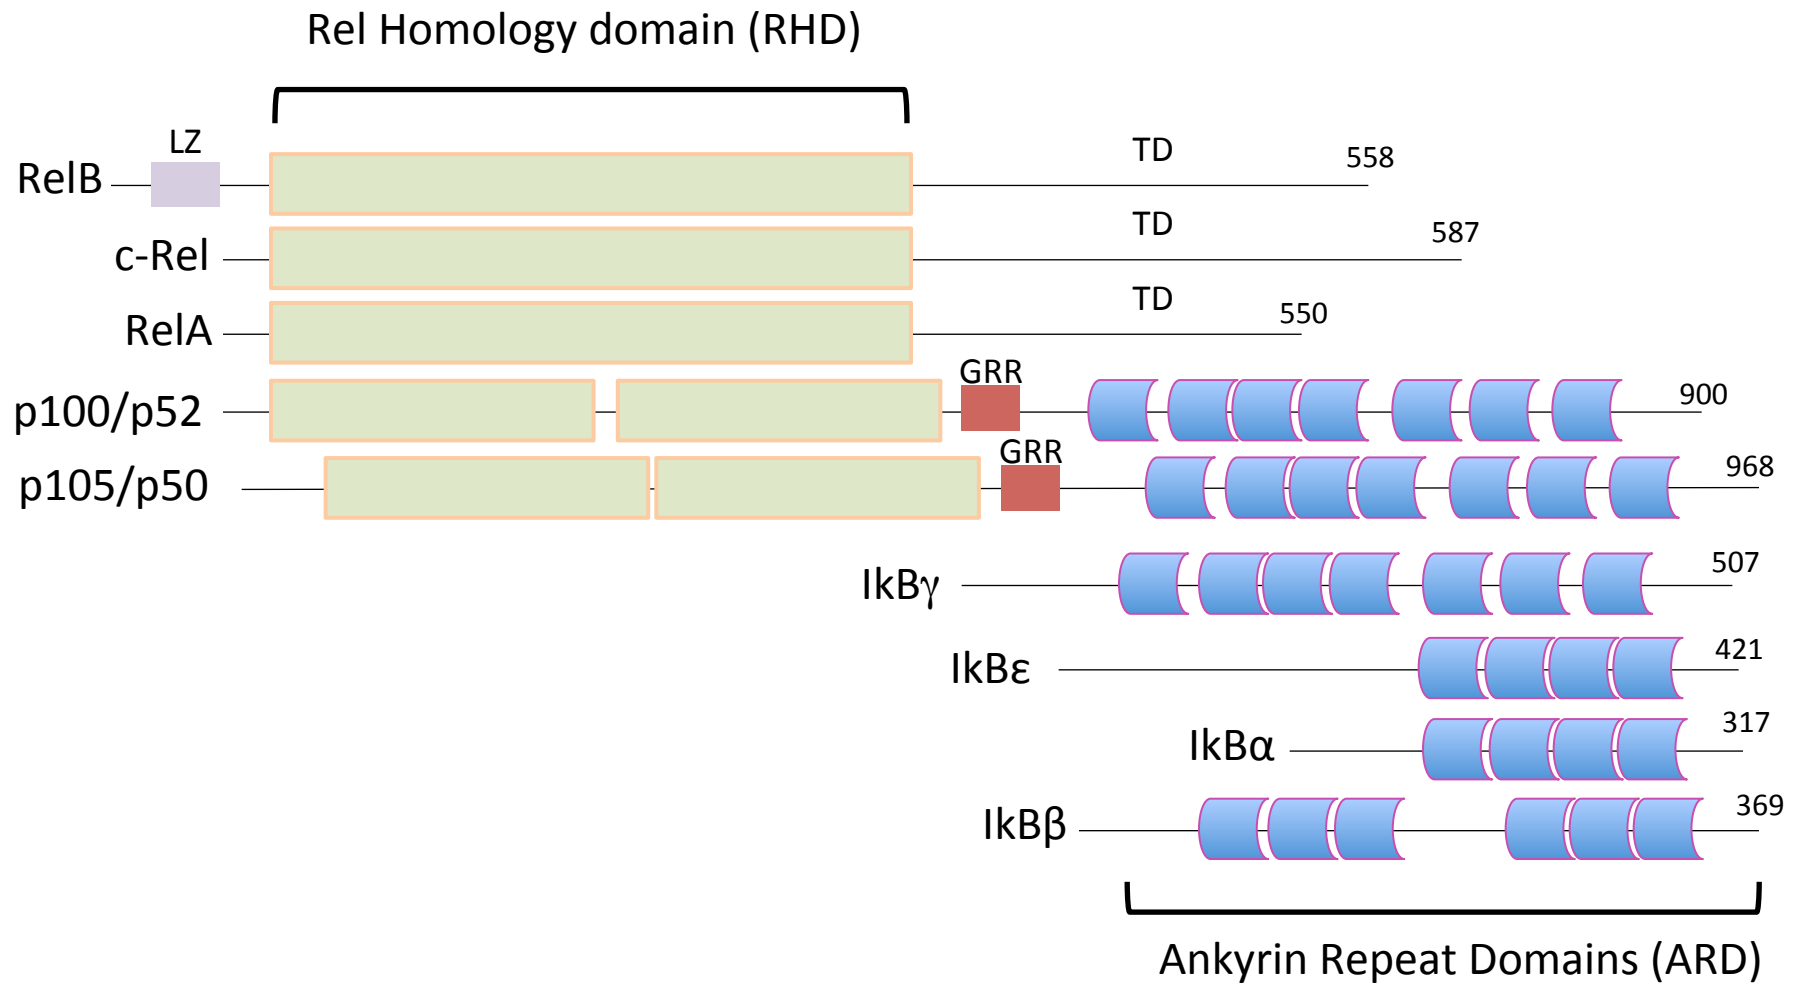

# Molecular mechanism of NF- $\kappa$ B activation and inhibition

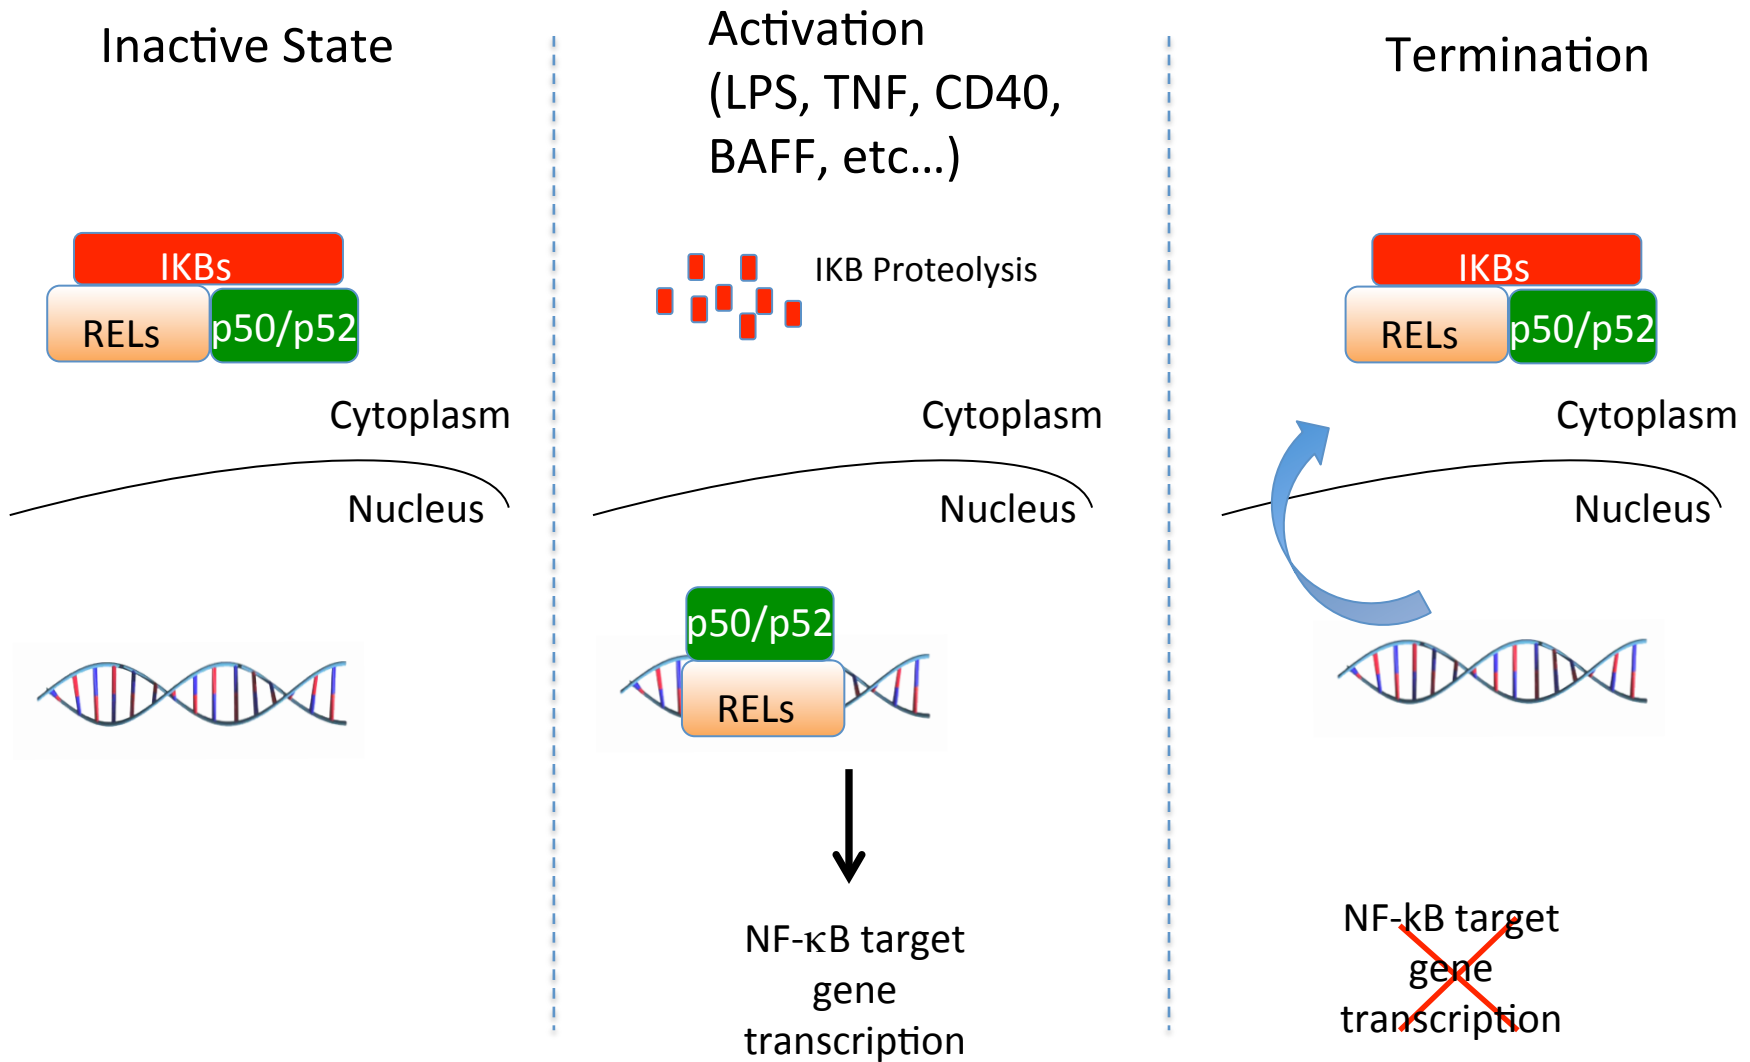

# The non-canonical pathway of NF- $\kappa$ B

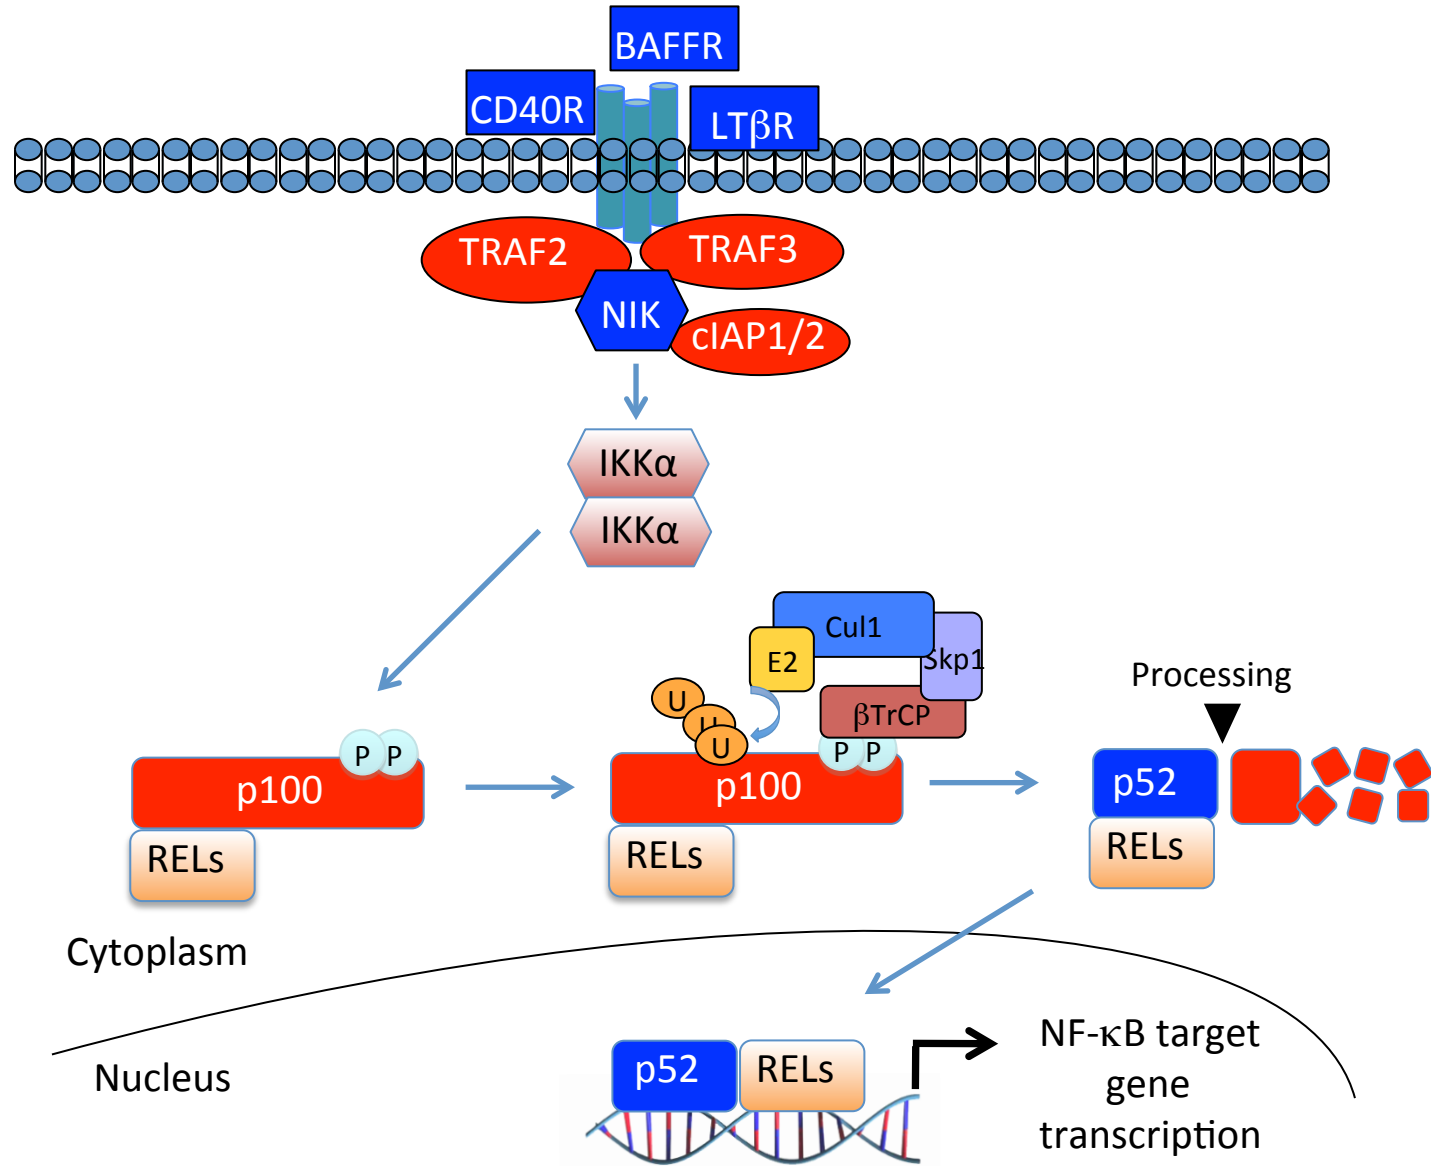

# p100 binds Fbxw7 $\alpha$ through Ser707 and Ser711

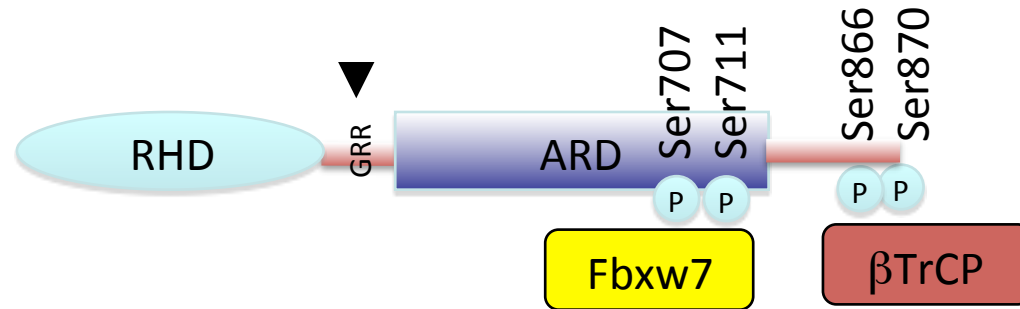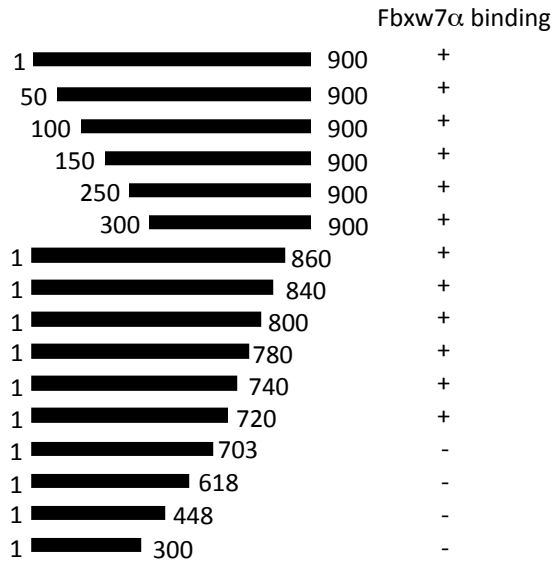

|                      |           |
|----------------------|-----------|
| p100                 | LPSPTSDS  |
| CyclinE <sub>1</sub> | LLTPPQSGK |
| CyclinE <sub>2</sub> | IPTPKEDD  |
| MYC                  | LPTPPLSPS |
| JUN                  | GETPPLSPI |
| Notch1               | FLTPSPESP |
| SREBP1               | TLTPPPSDA |

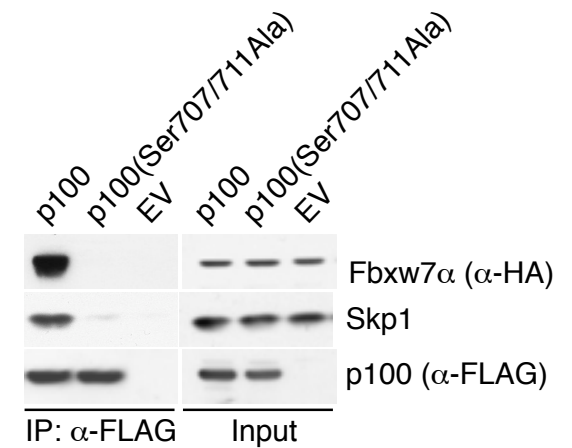

# Fbxw7 $\alpha$ binds p100 phosphorylated on Ser707

---

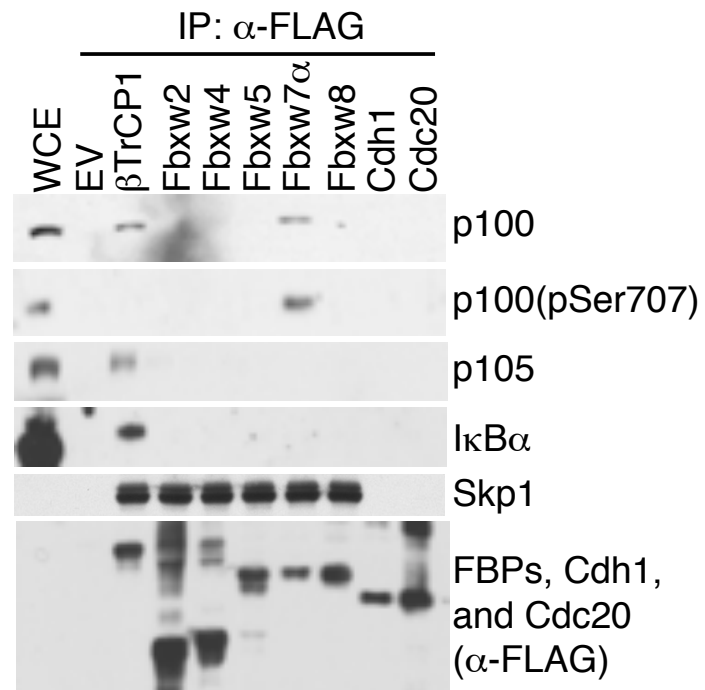

# Fbxw7 $\alpha$ and $\beta$ TrCP bind two different phospho-forms of p100

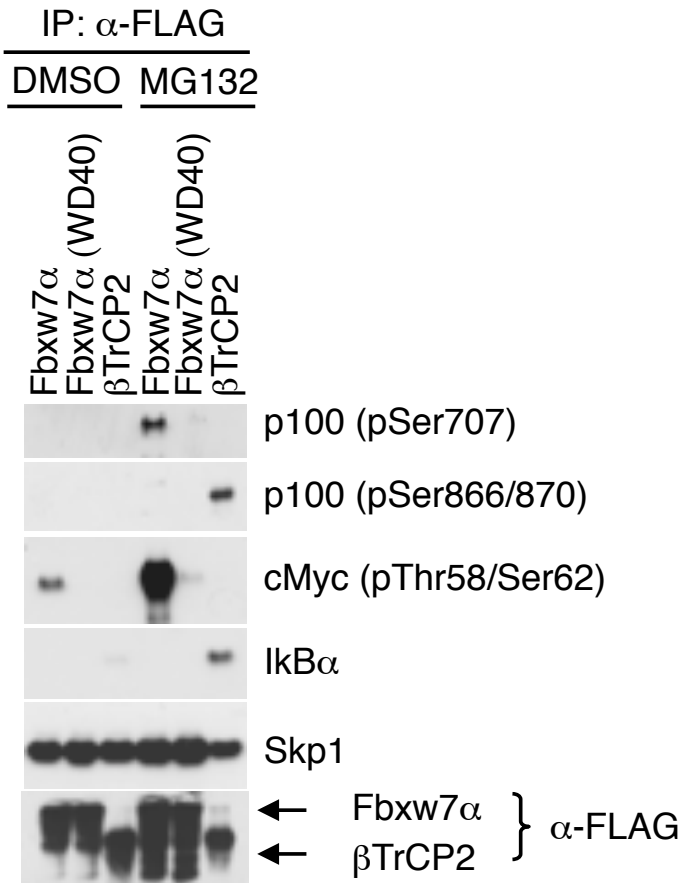

## Fbxw7-mediated degradation

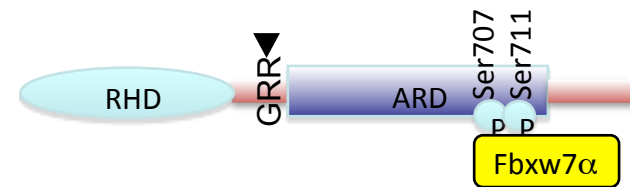

## $\beta$ TrCP-mediated processing

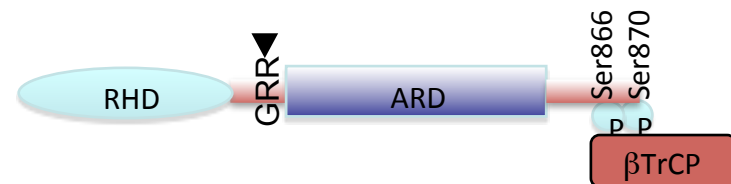

# GSK3 phosphorylates the p100 degron

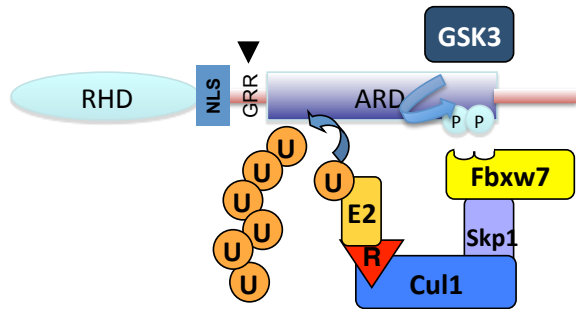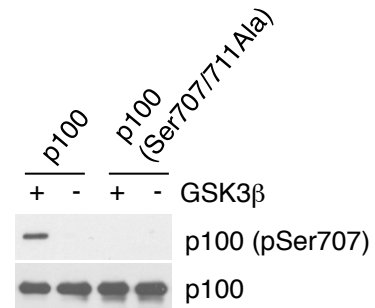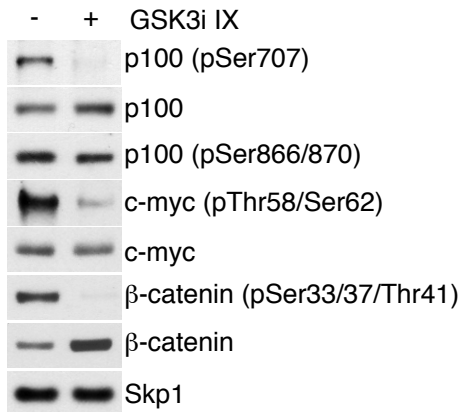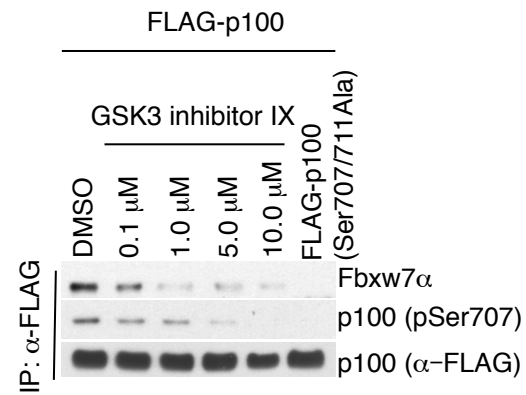



# p100 is ubiquitylated *in vitro* in an SCF<sup>Fbxw7 $\alpha$</sup> -dependent manner

E1, E2, ATP,  
Ubiquitin, GSK3

[<sup>35</sup>S]-labeled Substrate,  
SCF-Fbxw7

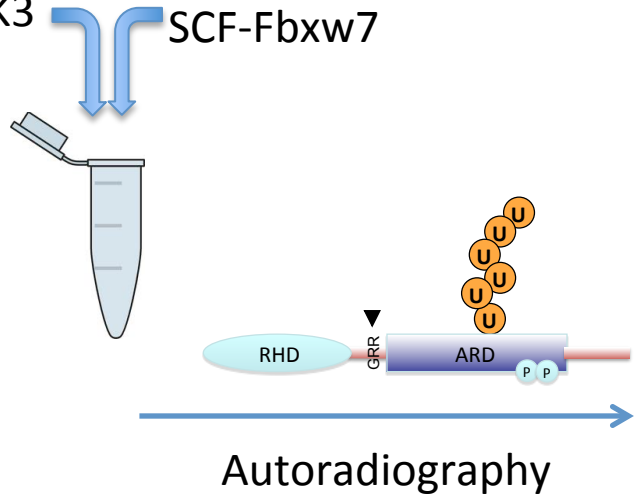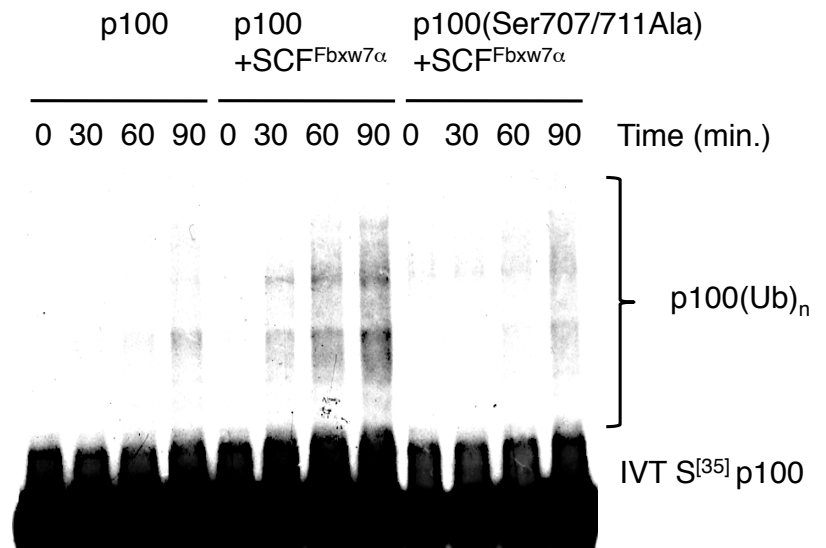

# p100 shuttles between the nucleus and cytoplasm

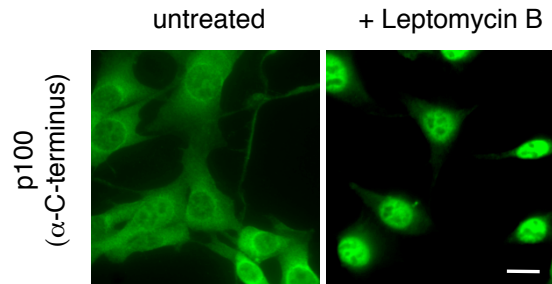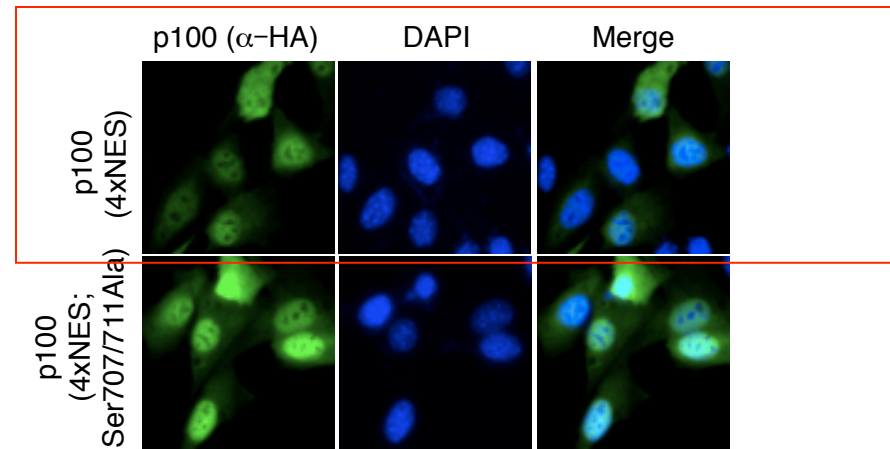

ΦxxxΦxxΦxΦ  
 LLEALSDMGL  
 AAEALSDAGA

PKI NES consensus  
 p100 (aa 831-840)

p100 (aa 831-840; 4xNES)

Φ = Hydrophobic Amino Acids  
 (Leu, Ile, Val, Met, Phe)

x = small/polar/charged amino acids

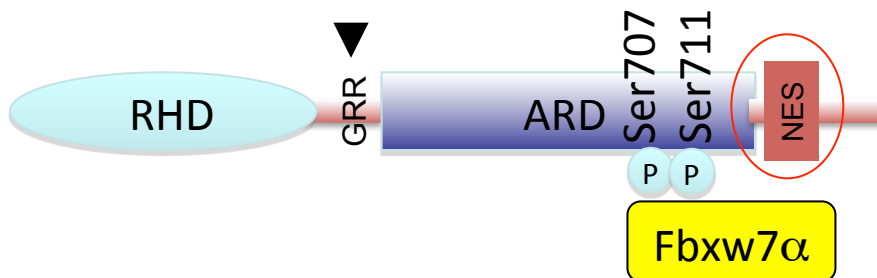

# p100 contains an NLS required for import into the nucleus

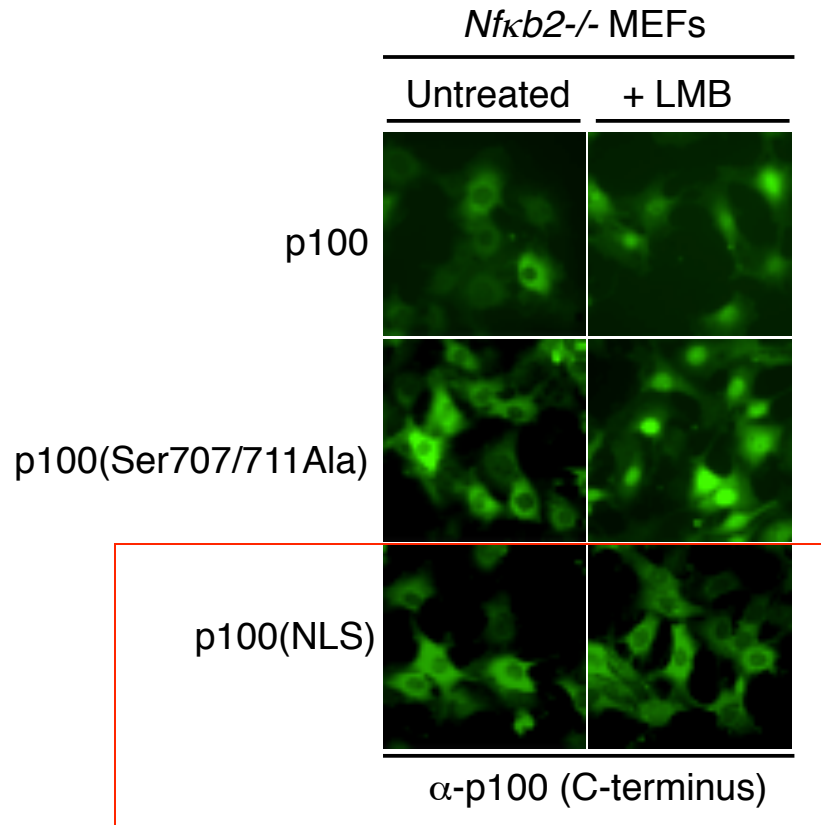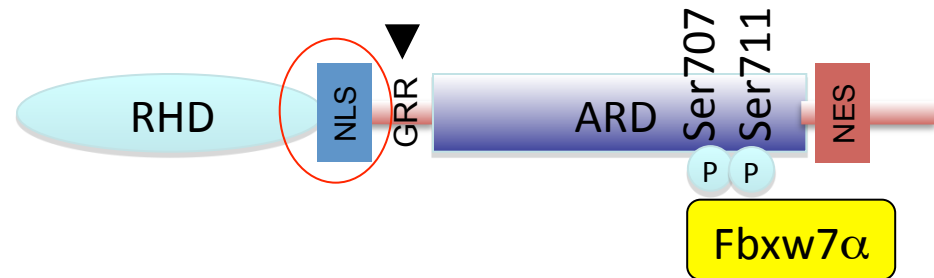

# Fbxw7 $\alpha$ targets only nuclear p100 for protein degradation

---

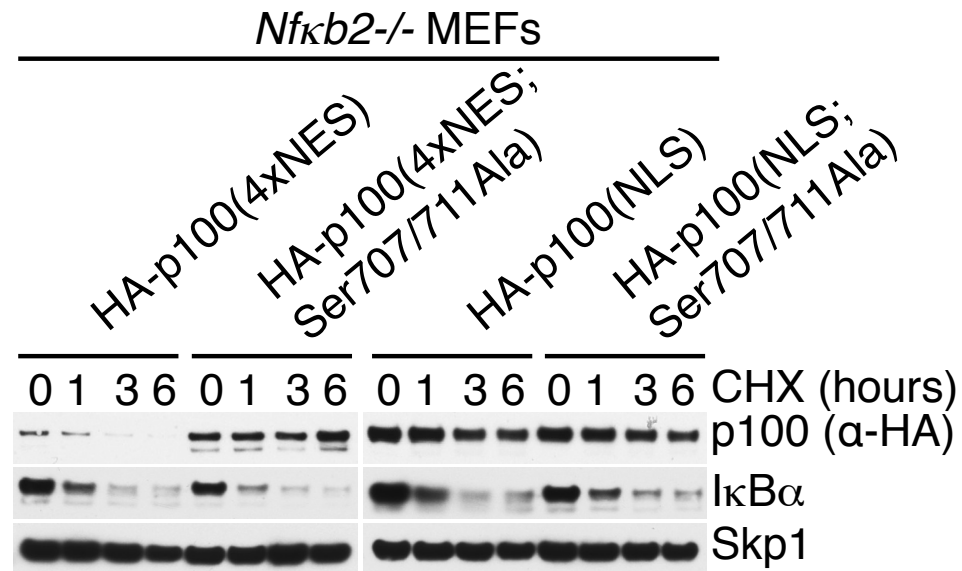

# p52 competes with Fbxw7 $\alpha$ for binding to the ARD of p100

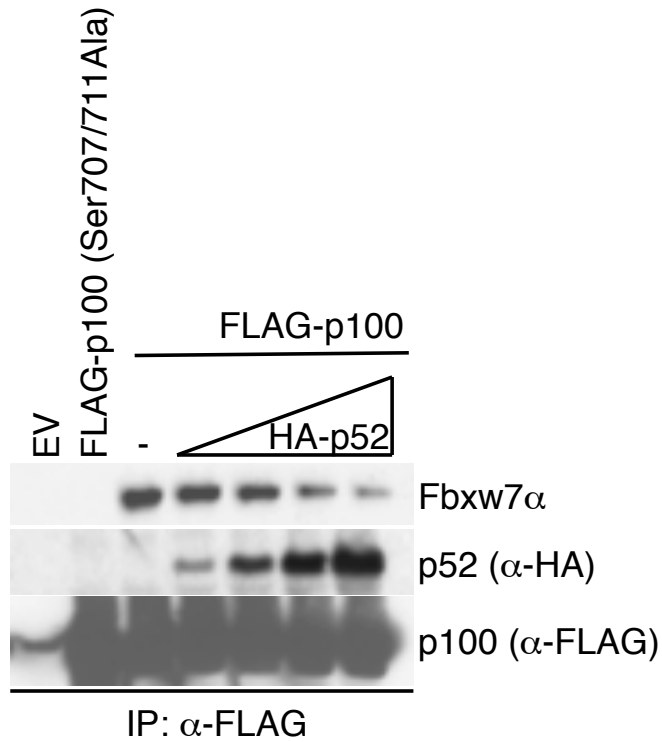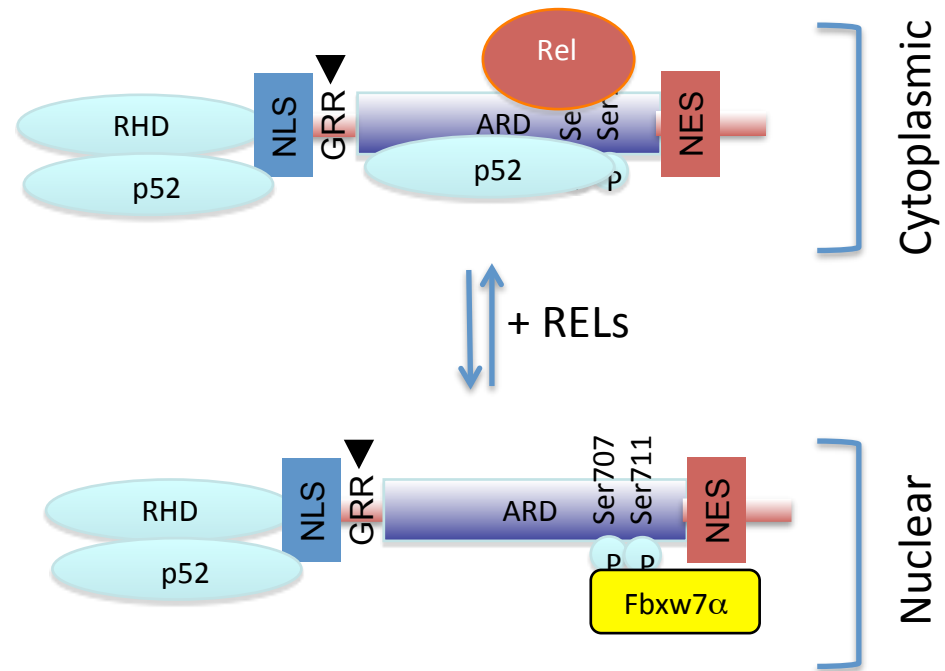

## Conclusions #1

---

a) *Shuttling of p100 requires an intact NLS (nuclear localization signal) and NES (nuclear export signal).*

b) *The majority of p100 is cytoplasmic since the nuclear pool is constitutively targeted for protein degradation by Fbxw7/GSK3. Accordingly, the p100-cytoplasmic pool is insensitive to Fbxw7-mediated degradation.*



## Inducible processing

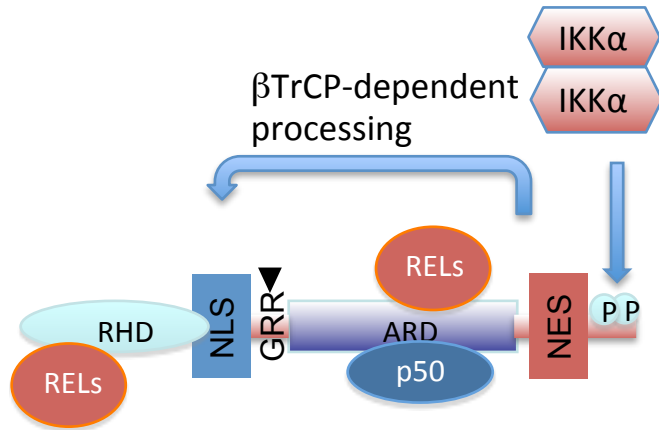

## Constitutive nuclear degradation

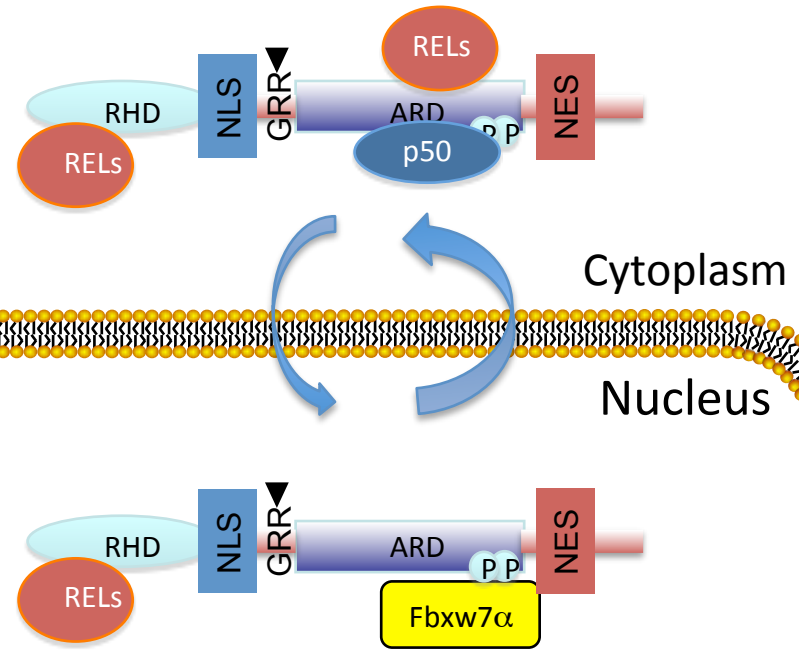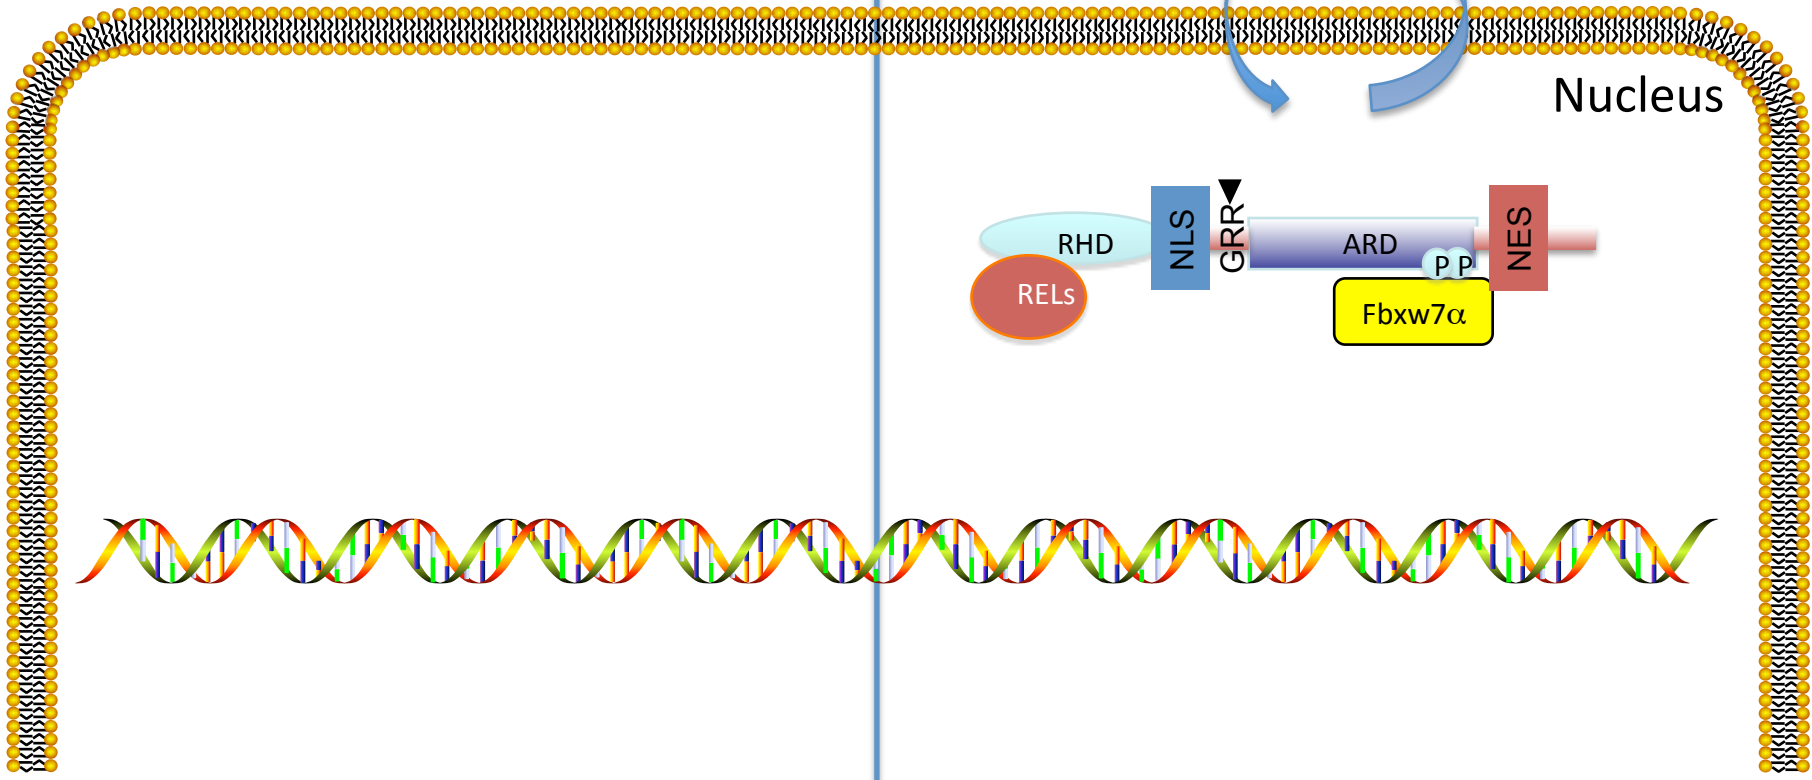



## Translocation of p52:RELS complex in the nucleus

## Constitutive degradation

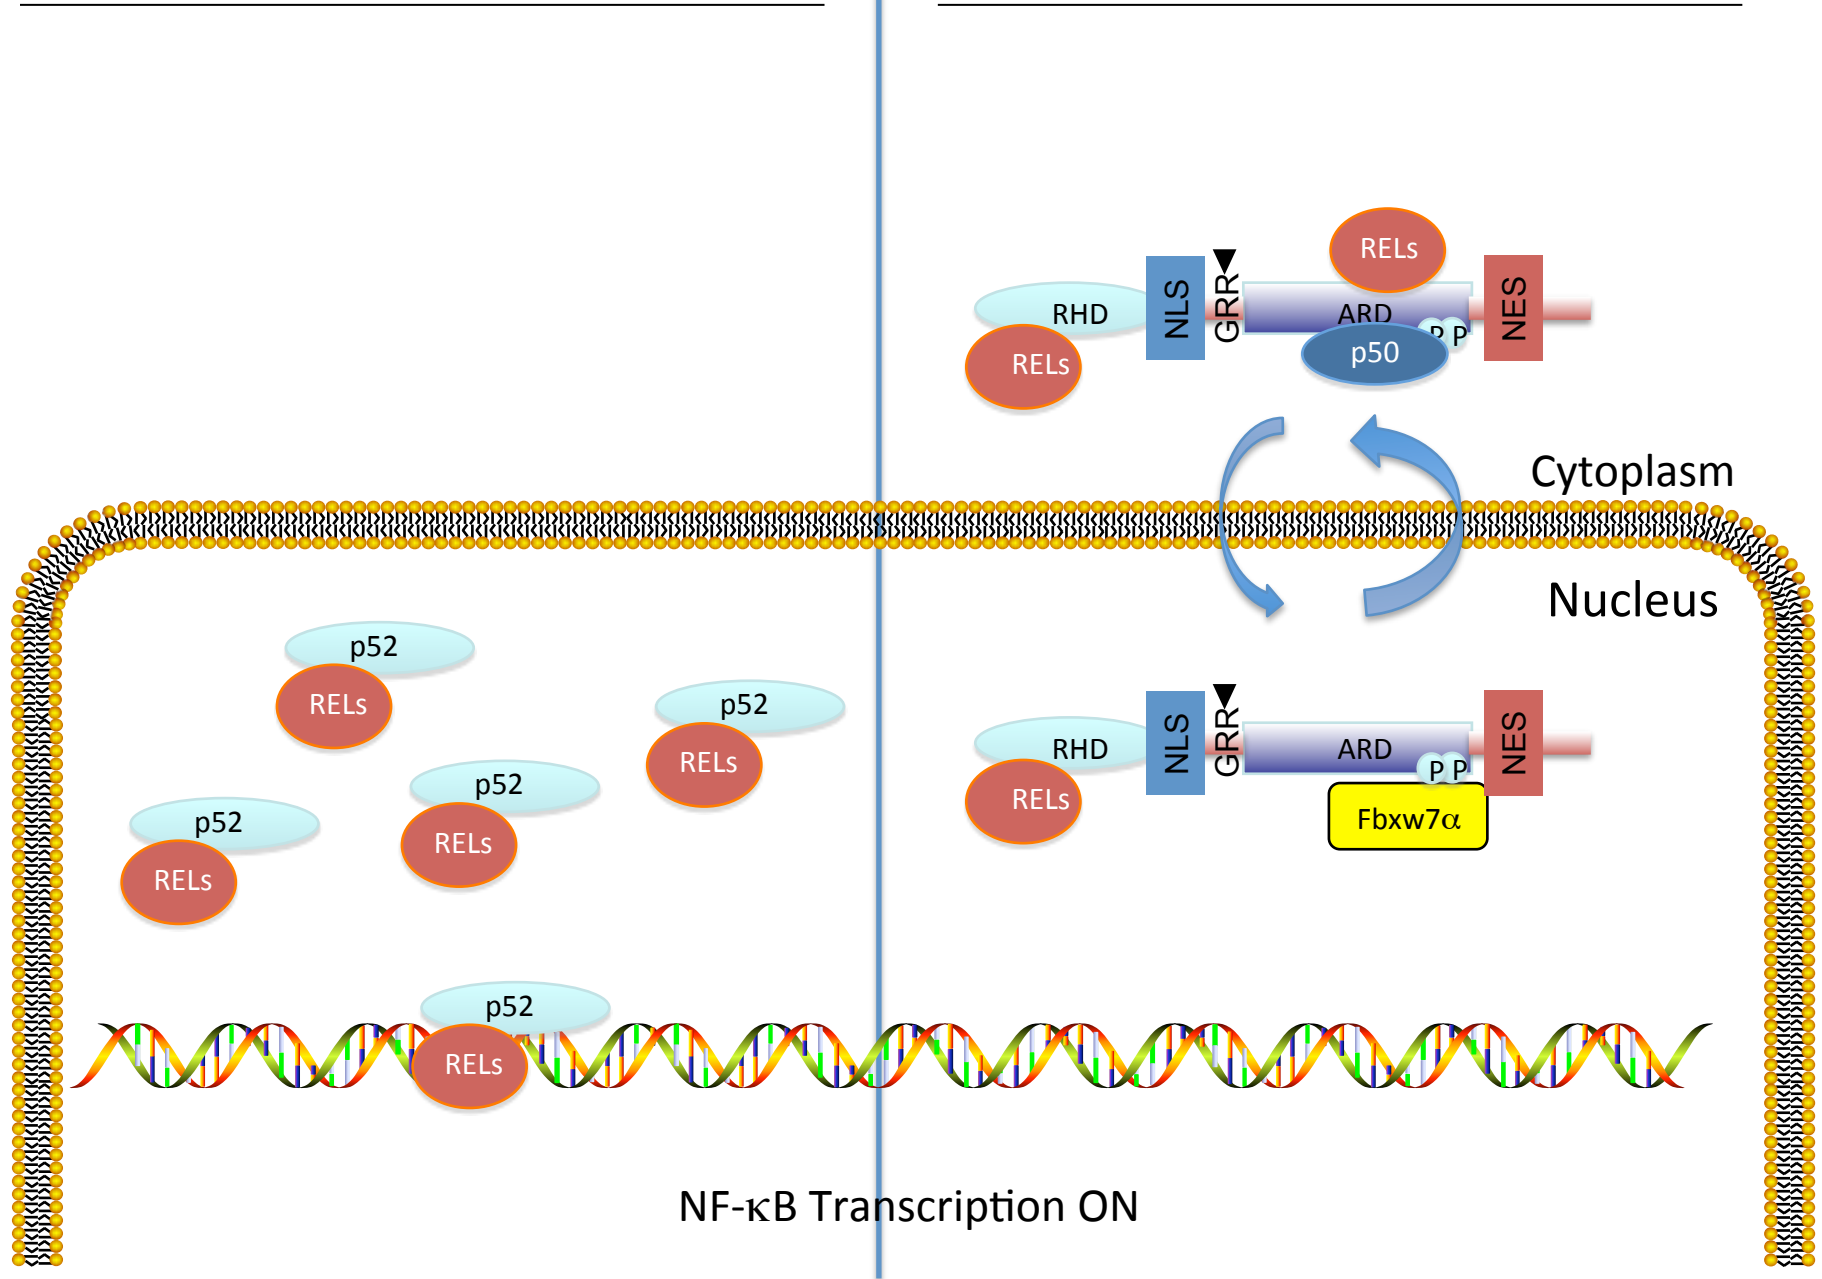

# p52-RELS competition with Fbxw7 for binding to p100

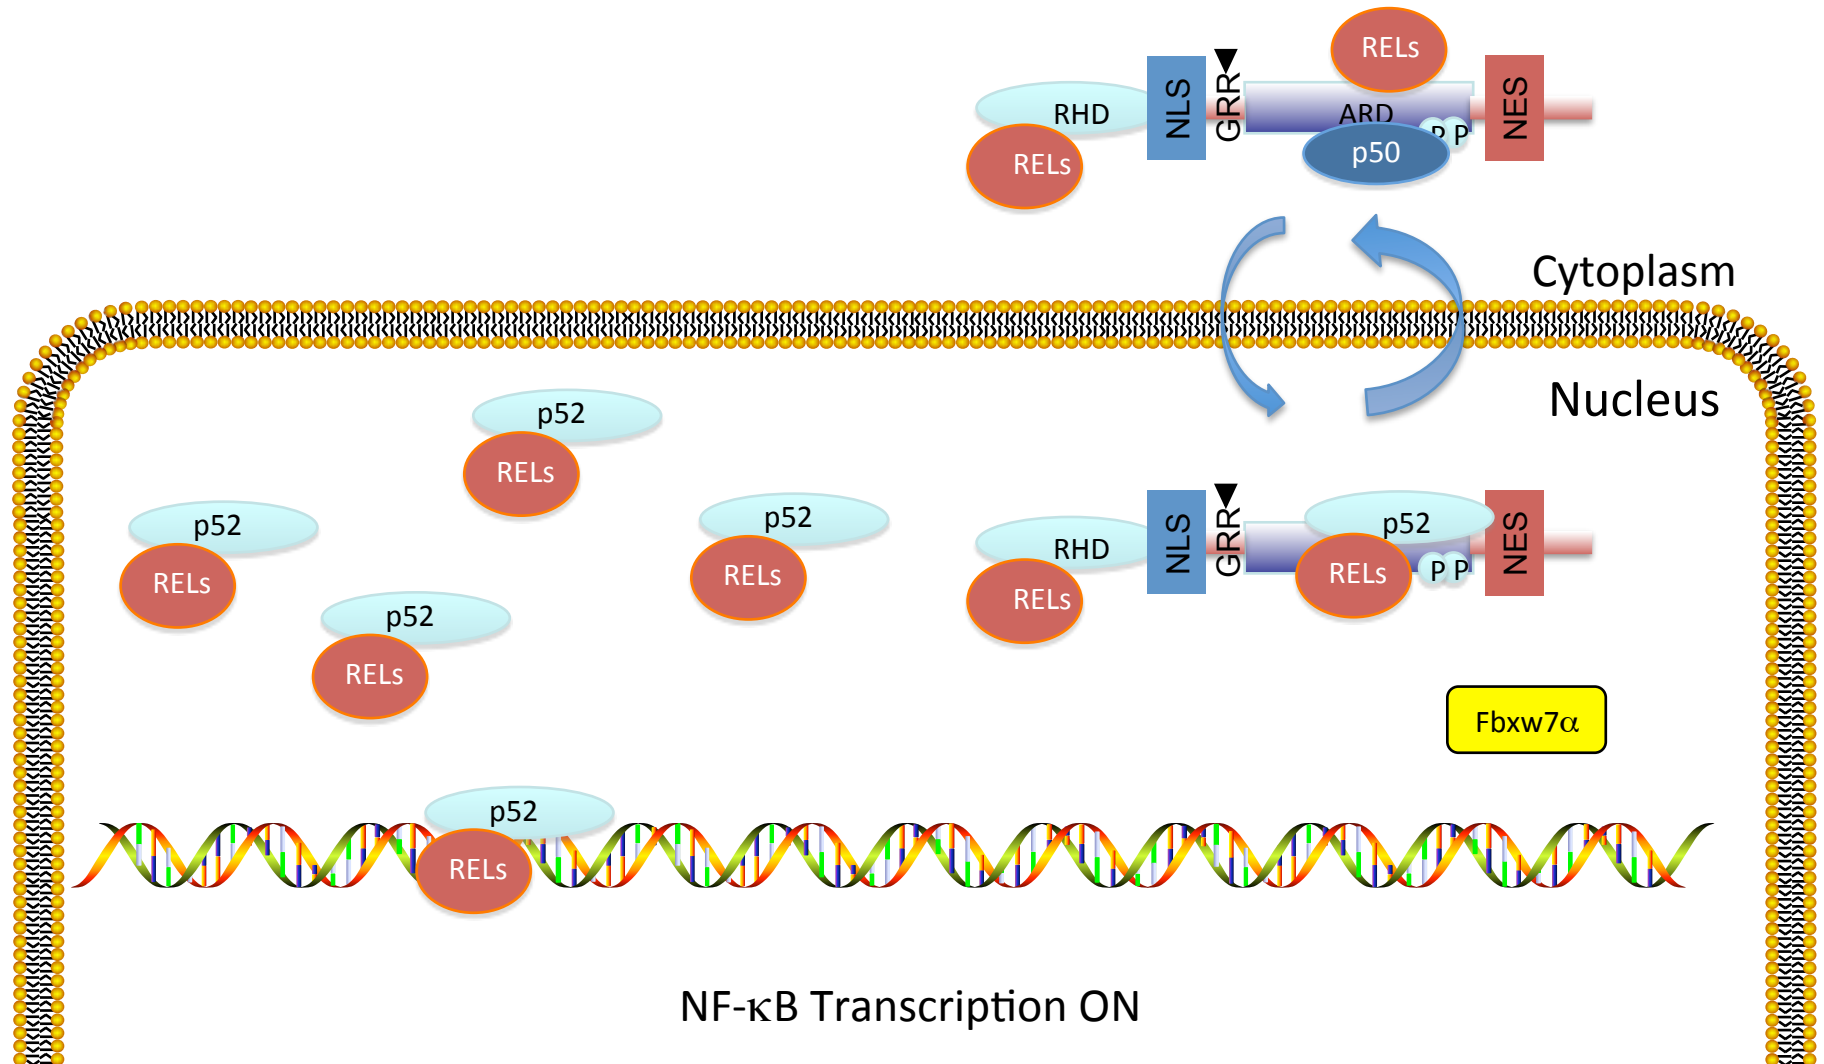

# p100 stabilization and termination of NF- $\kappa$ B signaling

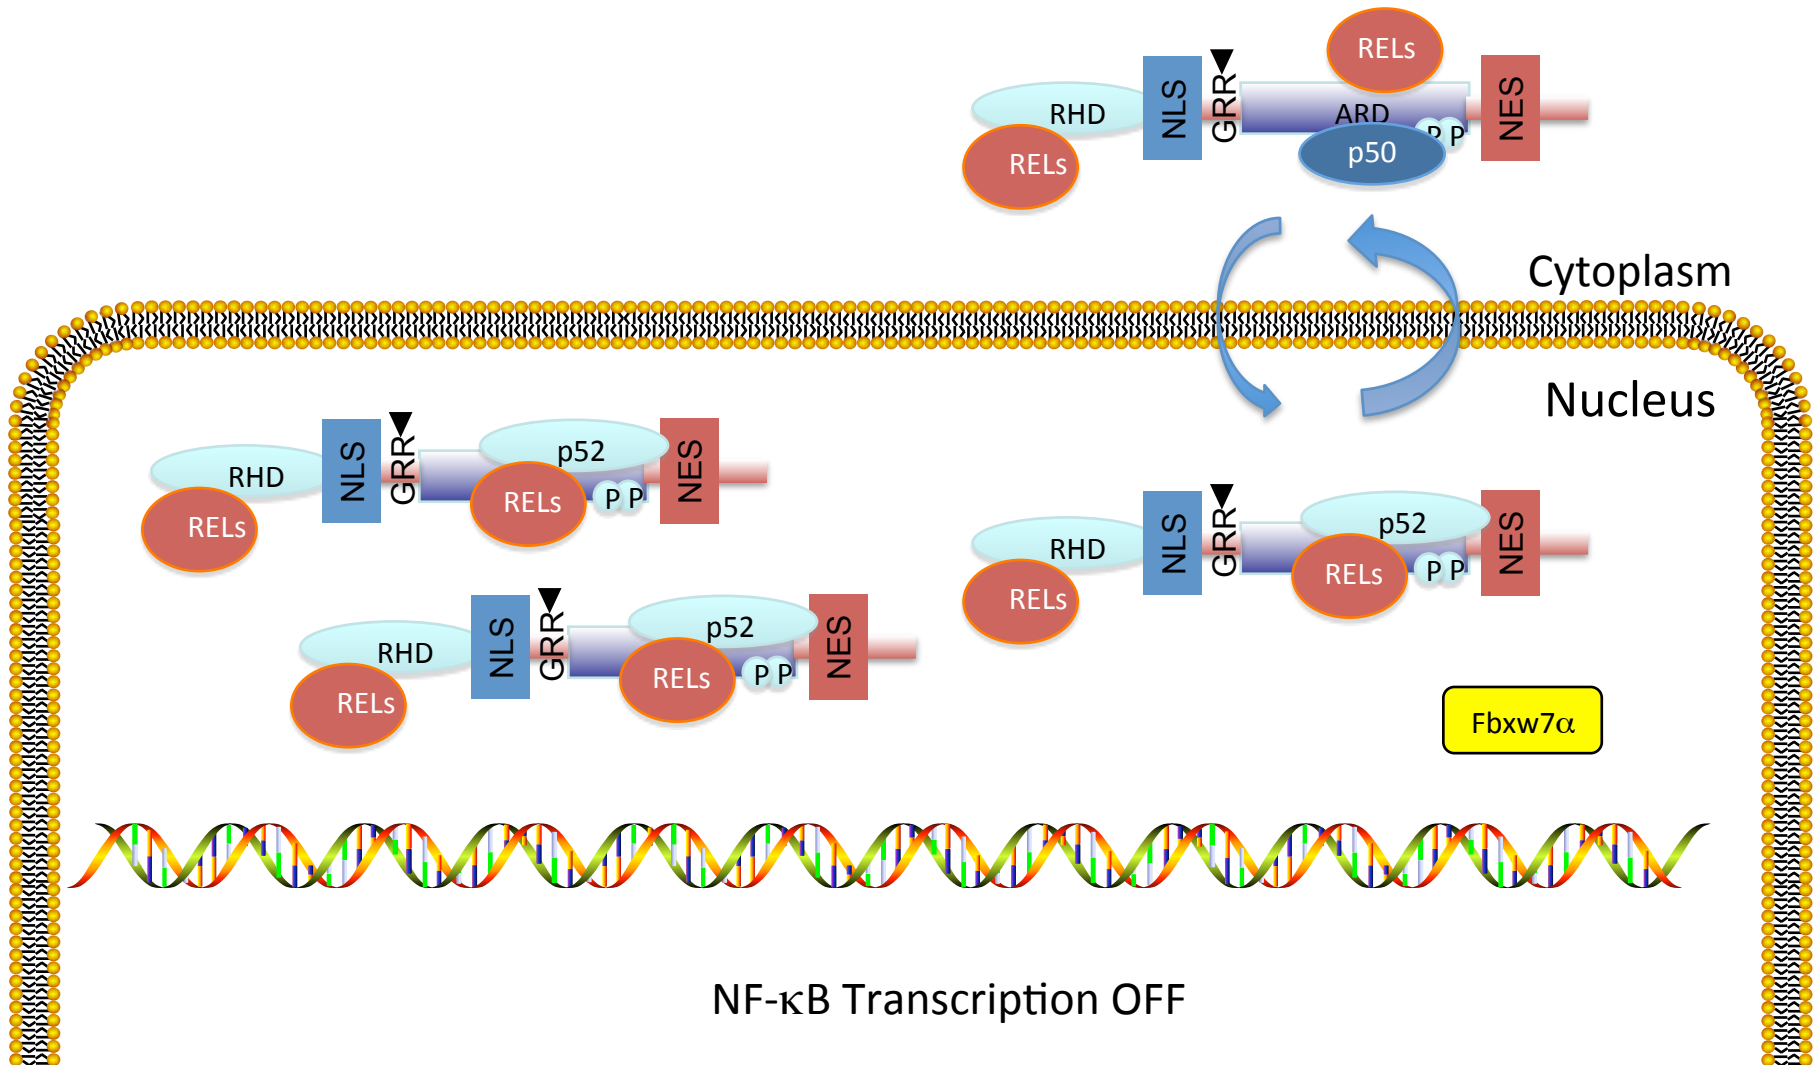

# Stabilization of p100 in the nucleus inhibits NF- $\kappa$ B target gene transcription following LT $\beta$ R activation

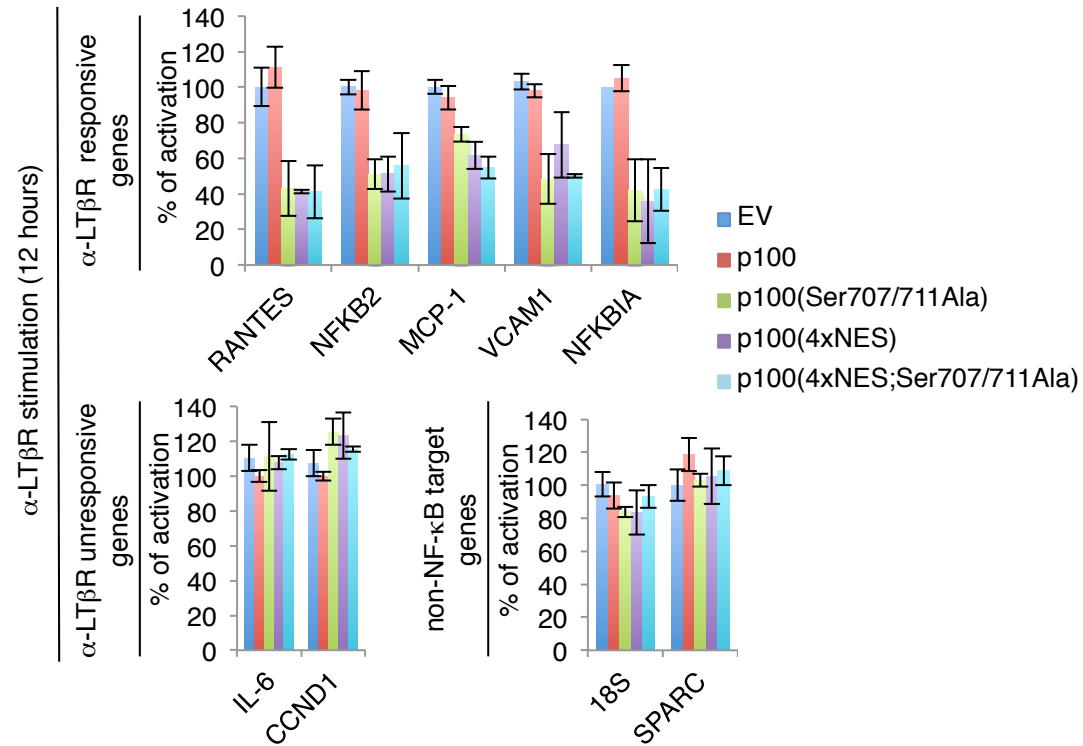

# Stabilization of p100 in the nucleus inhibits RelB binding at LT $\beta$ R-responsive gene promoters

---

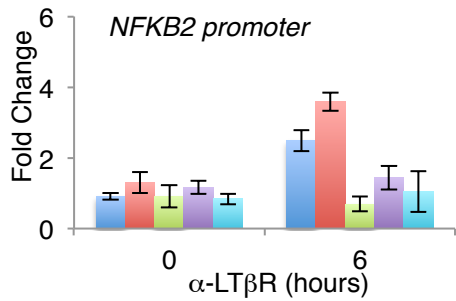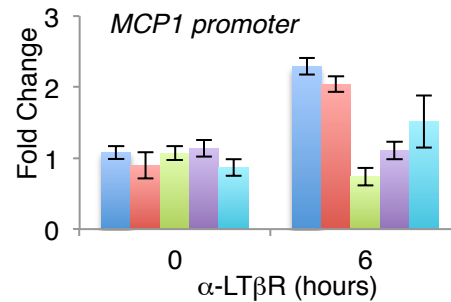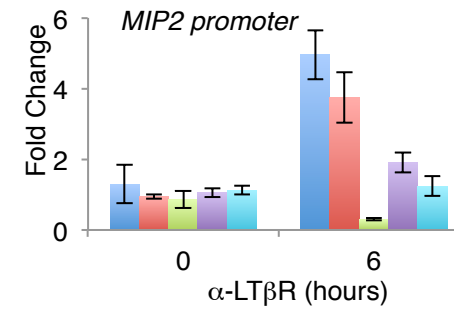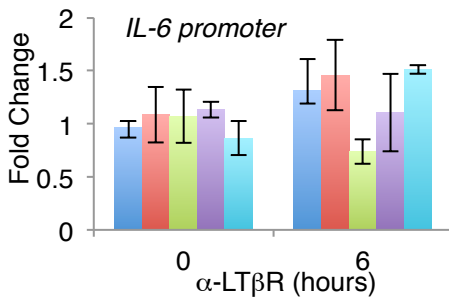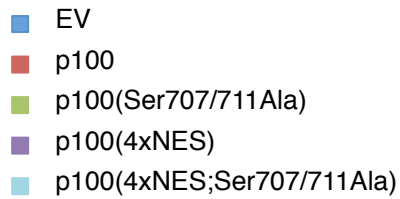

## Conclusions #2

---

*The molecular mechanisms controlling levels of p100 in the nucleus allow the initiation and termination of the NF- $\kappa$ B transcription program.*

## *FBXW7* mutations are absent in B-cell derived tumors

---

- Mutation of *FBXW7* gene have been found in many cancers, including: T-ALL, breast cancers, cholangiocarcinoma, gastric adenocarcinoma, and head and neck squamous carcinoma

Thompson, B. J. *et al.*, *J Exp Med* 2007  
Rajagopalan, H. *et al.*, *Nature* 2004  
O'Neil, J. *et al.*, *J Exp Med* 2007  
Stransky, N. *et al.*, *Science*, 2011

- Sequenced exons 9 and 10 of twenty-four multiple myeloma cell lines.
- No mutations found.

-Sequencing of *FBXW7* in primary B-cell tumors (from the literature):

Study #1

0/20 B-ALL

0/20 B-CLL

Akhoondi et al. *Cancer Res.* 2007.

Study #2

0/92 non-Hodgkins lymphoma

Song et al. *Leuk, Res.* 2008.

# Relevance of NF- $\kappa$ B signaling in stromal-independent multiple myeloma

---

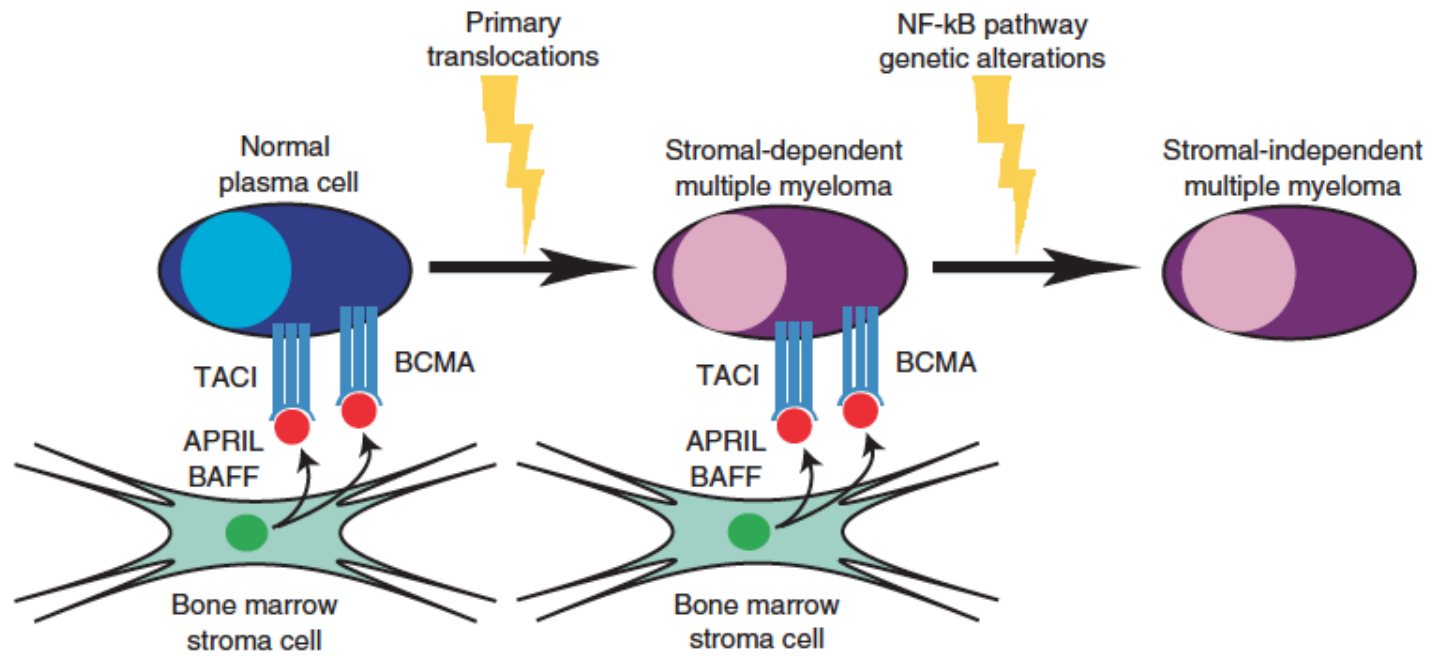



# Mutations activate non-canonical NF- $\kappa$ B signaling in multiple myeloma

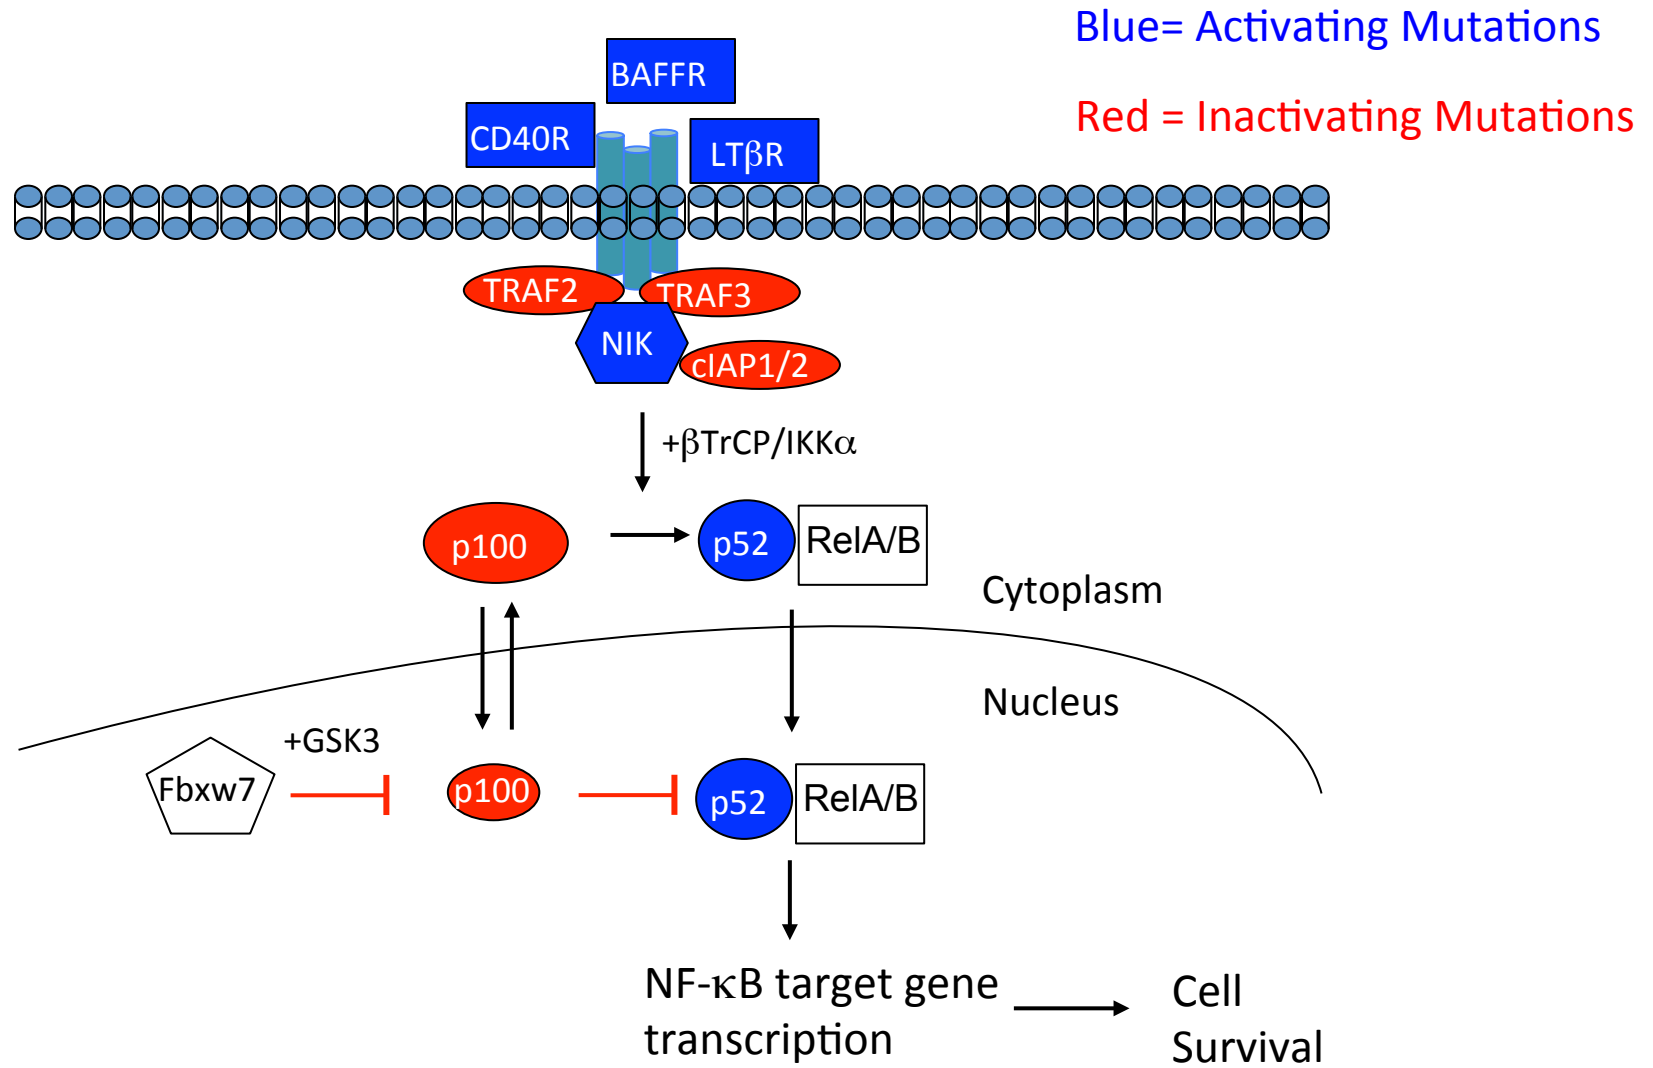

Keats et. al. *Cancer Cell.* (12) 2007.

Annunziata et. al. *Cancer Cell.* (12) 2007.

# Depletion of Fbxw7 inhibits multiple myeloma cell growth

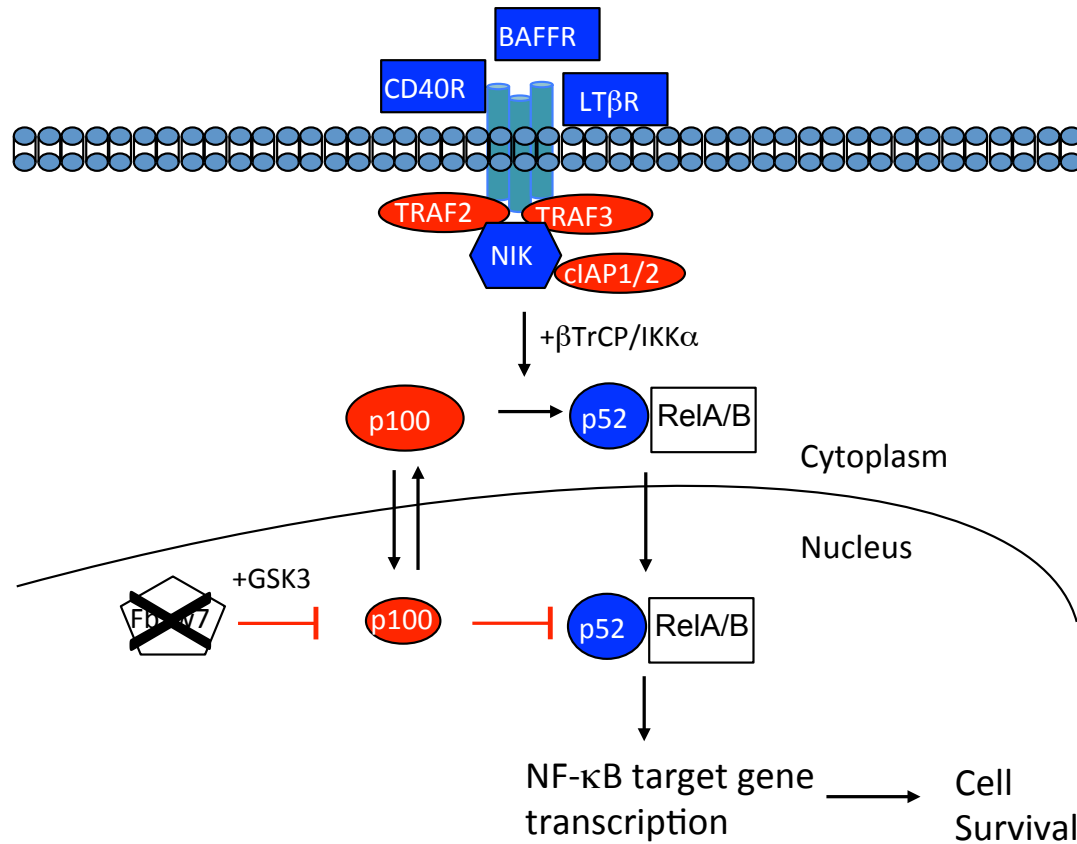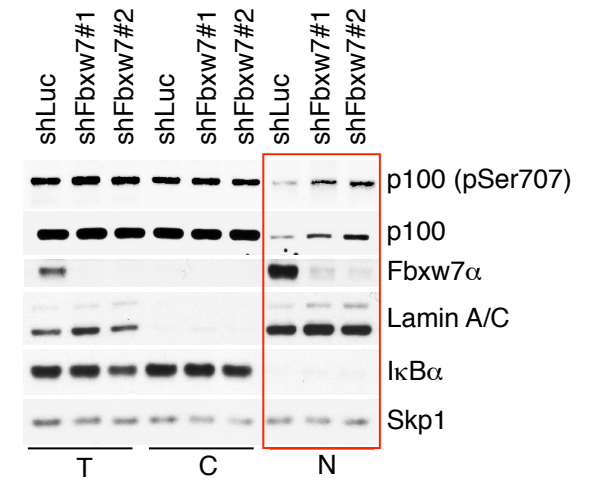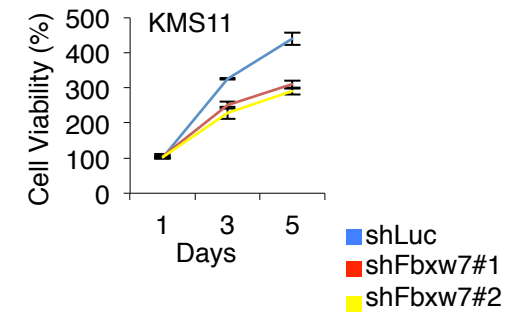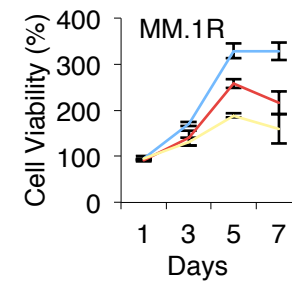

# Expression of a p100 mutant resistant to Fbxw7-dependent degradation inhibits multiple myeloma cell growth

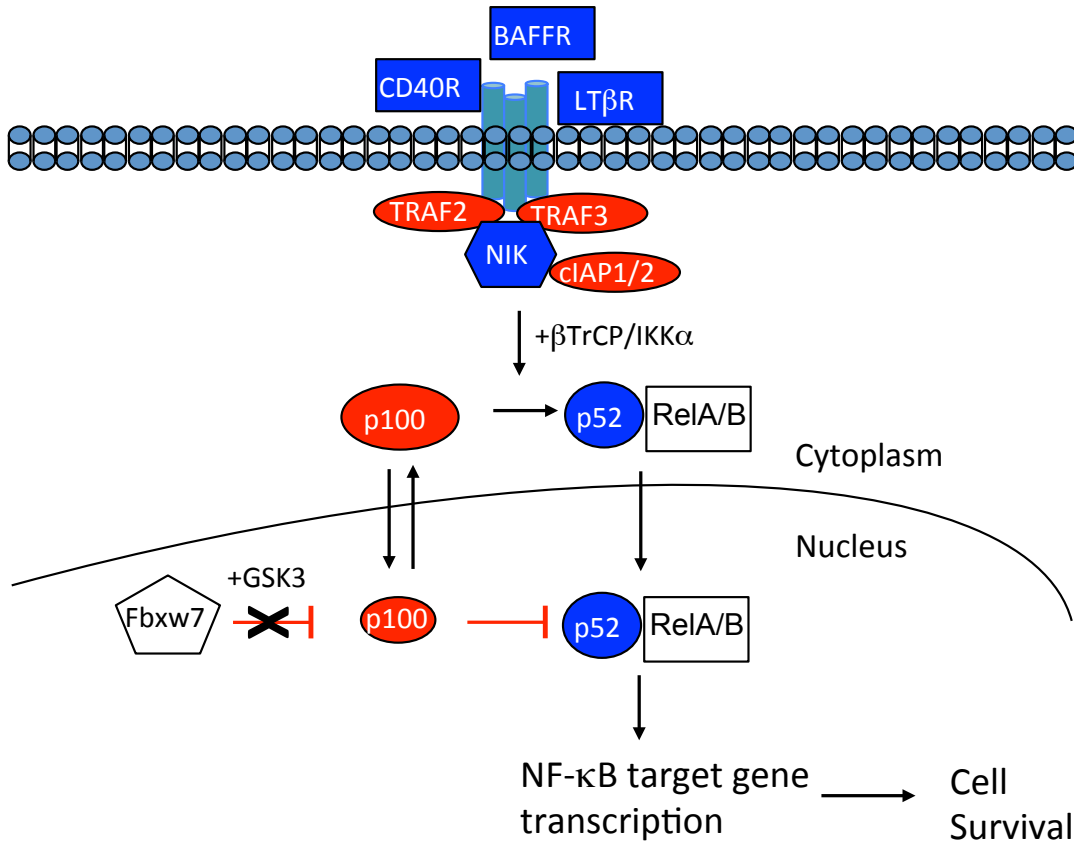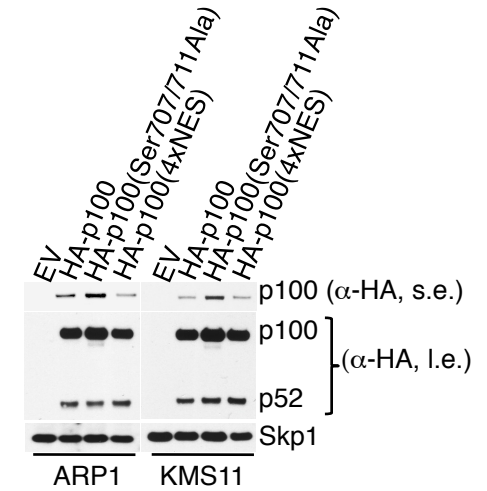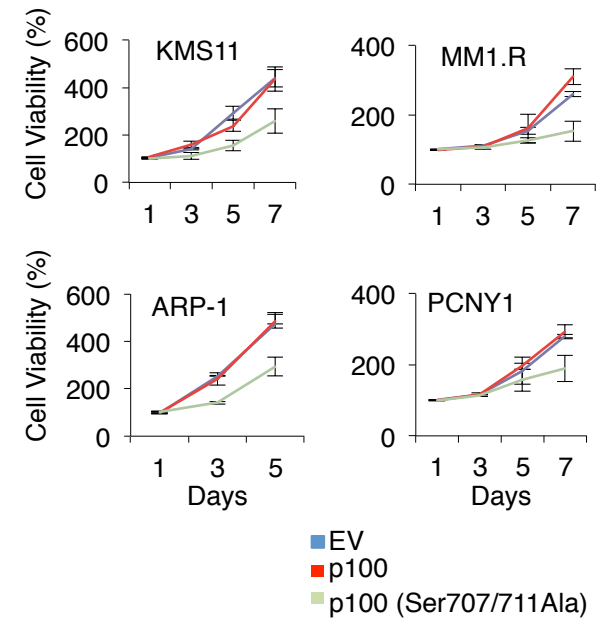

# Expression of stable p100 inhibits the growth of myeloma cells xenotransplanted into SCID mice

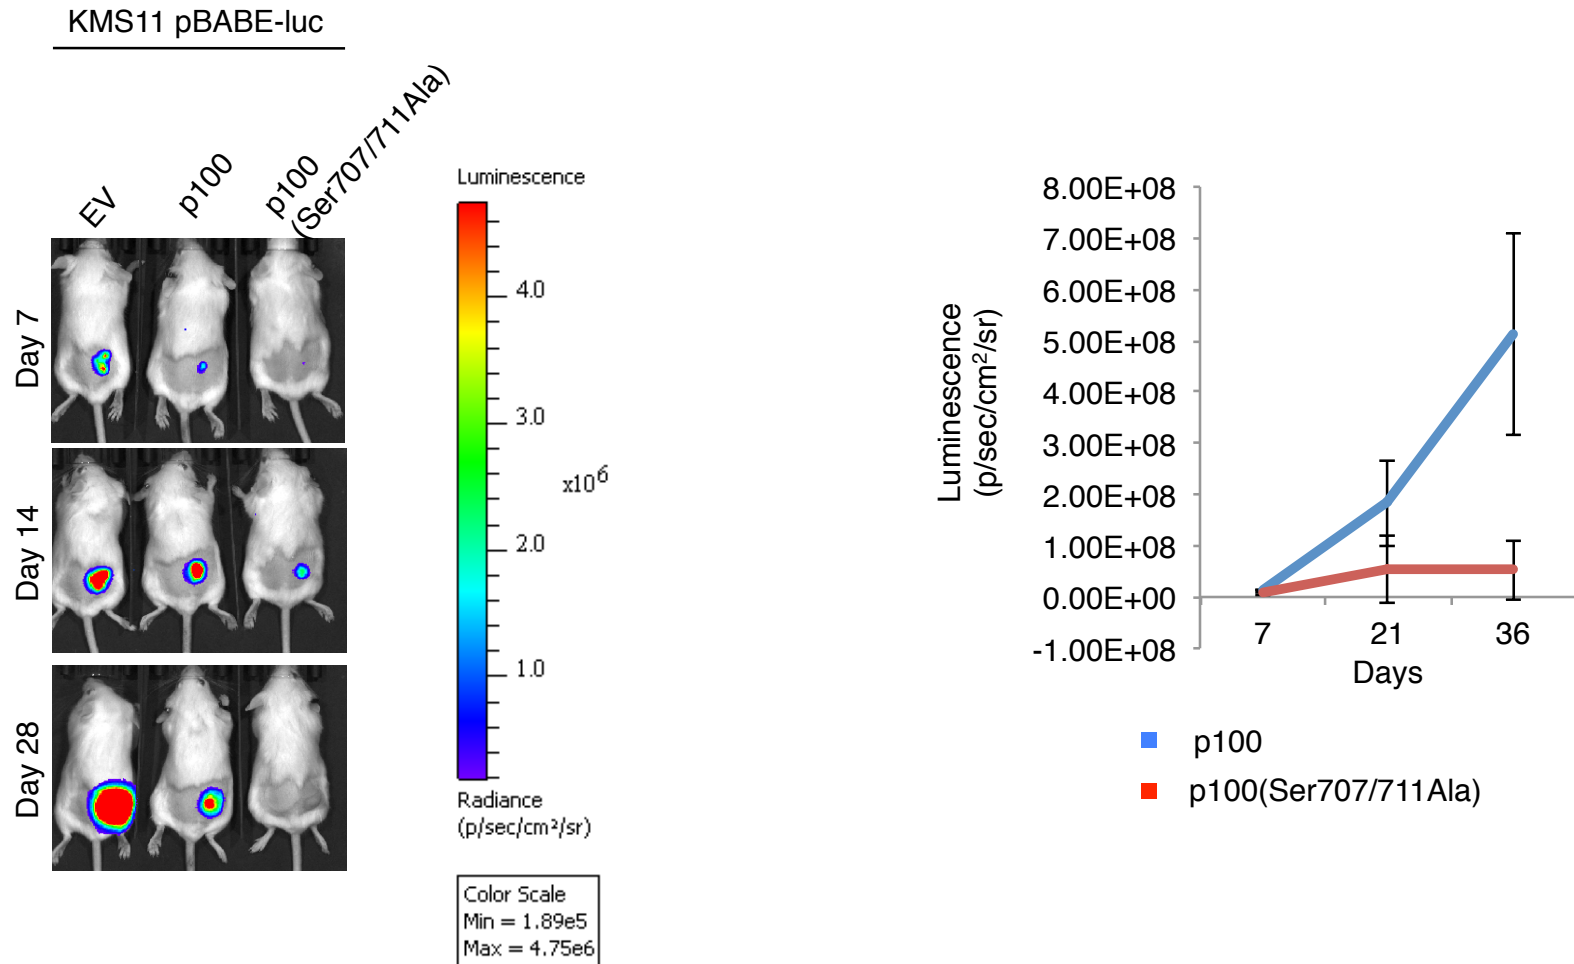

# Forced localization of p100 in the nucleus results in decreased growth of myeloma cells

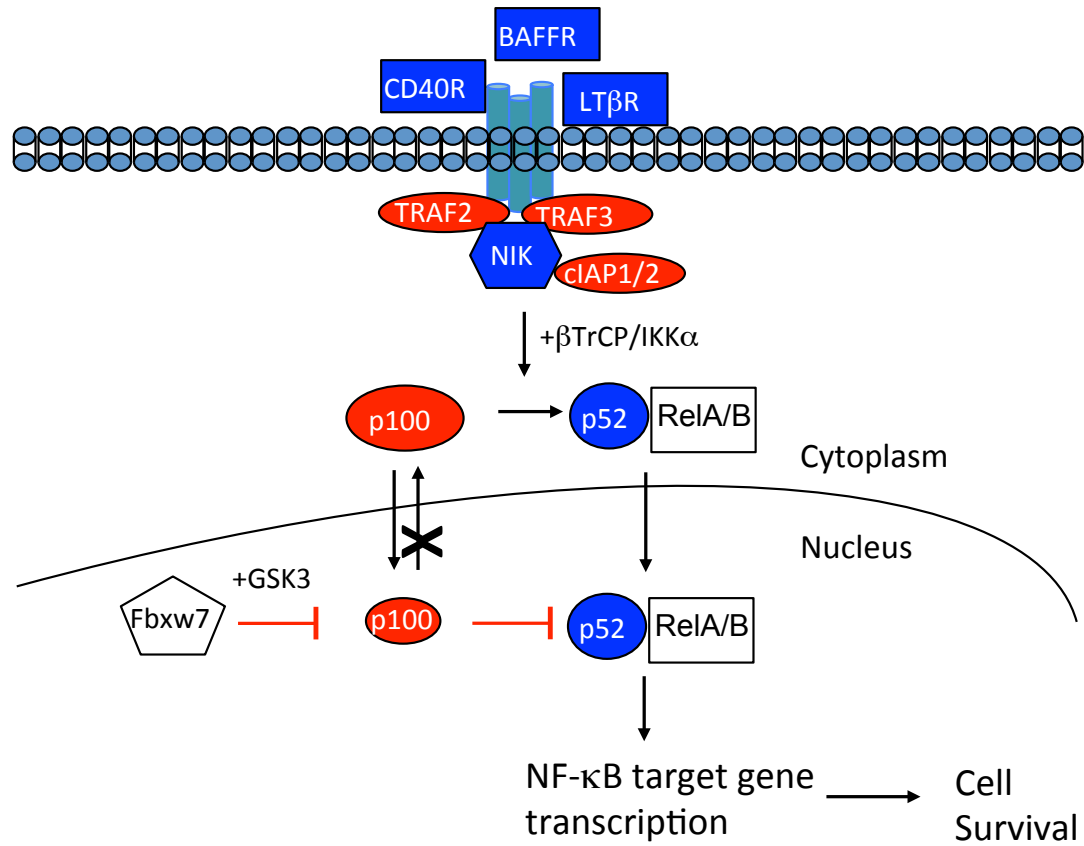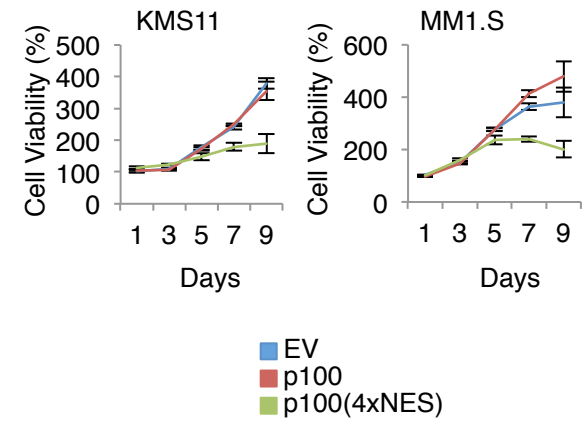

# Chemical inhibition of the proteasome, Cullin-RING ligases, or GSK3 leads to p100 accumulation in the nucleus

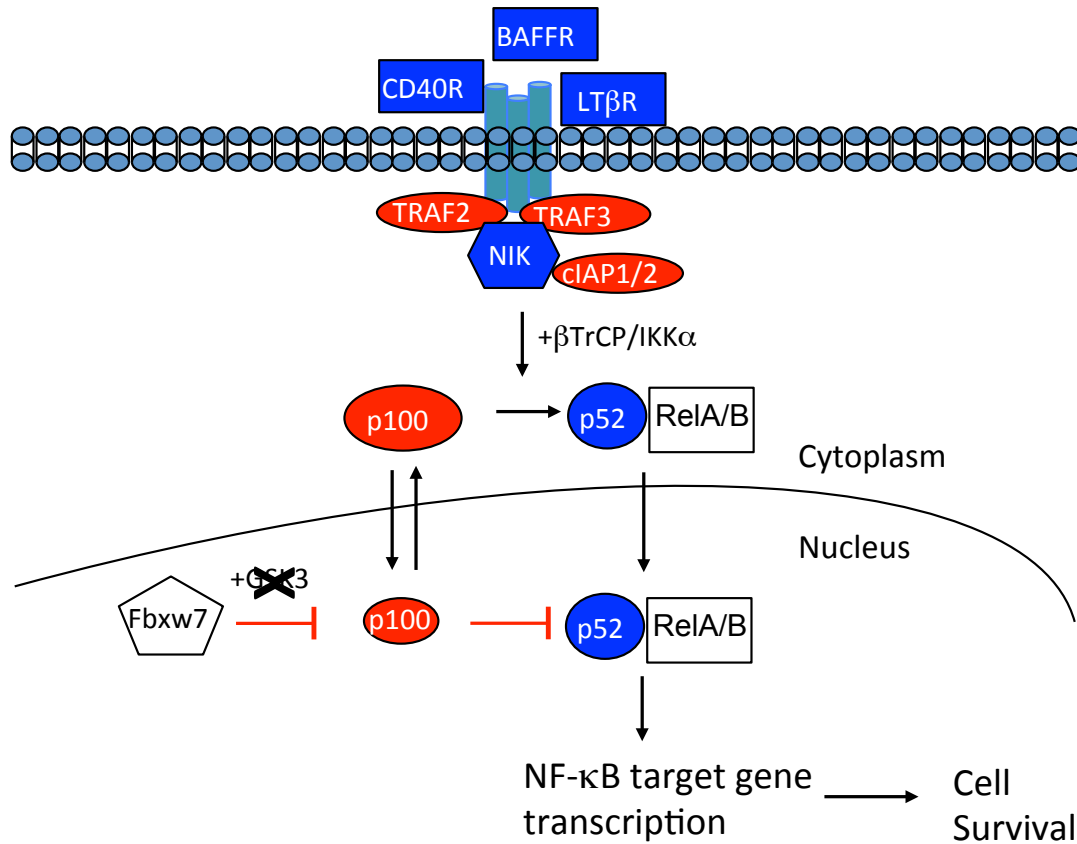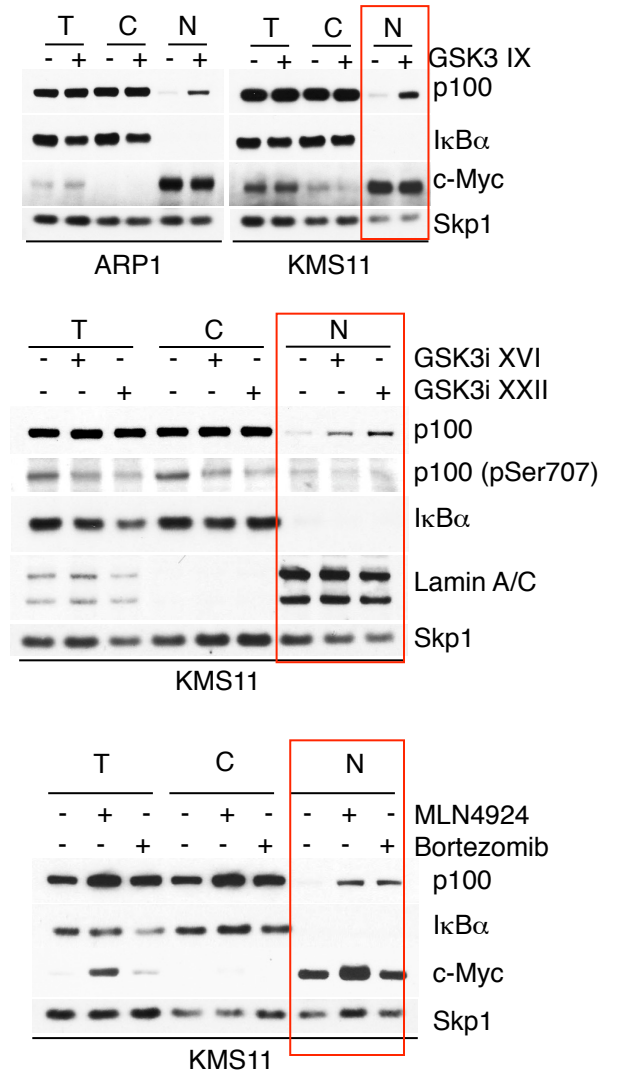

# Chemical inhibition of the proteasome, Cullin-RING ligases, or GSK3 is toxic to multiple myeloma cells

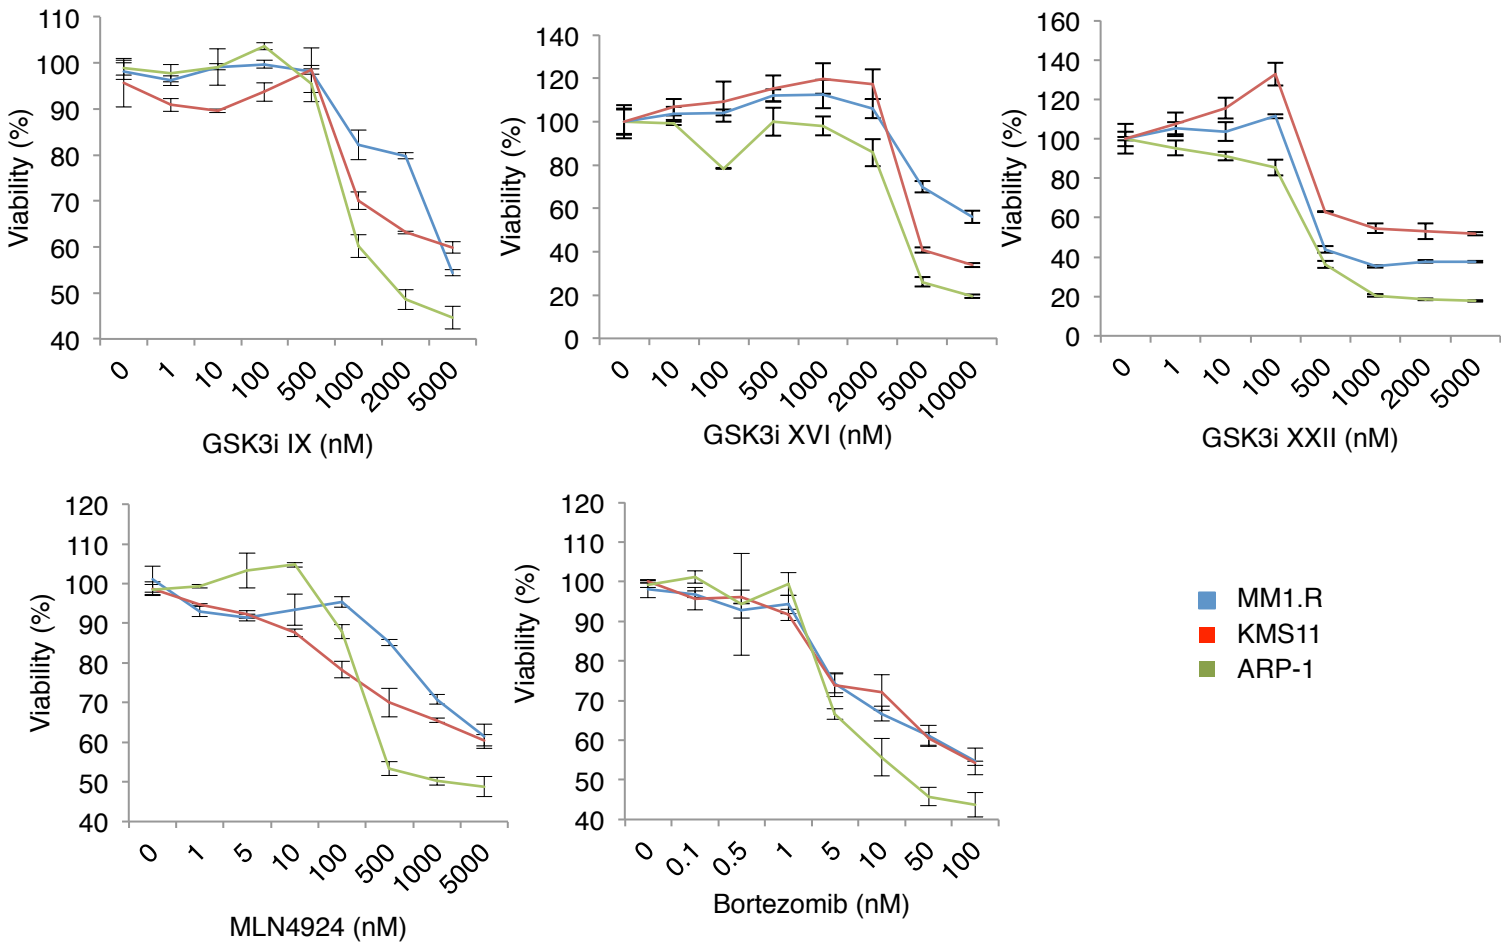

# GSK3 toxicity is partially dependent on p100

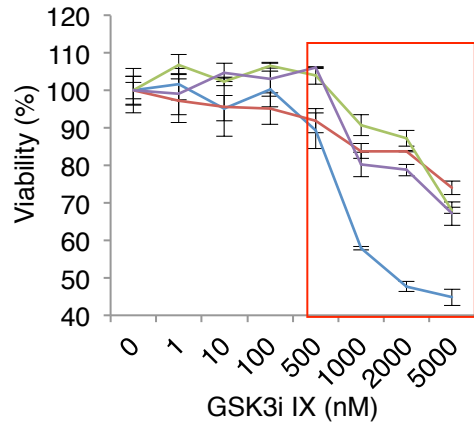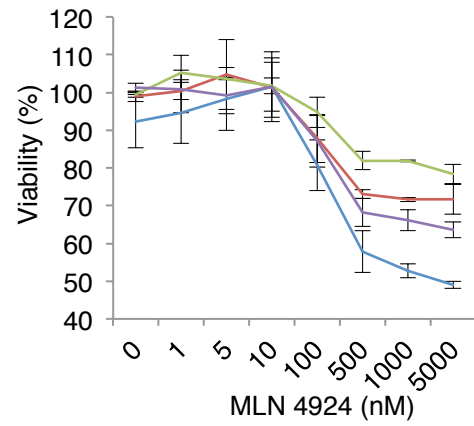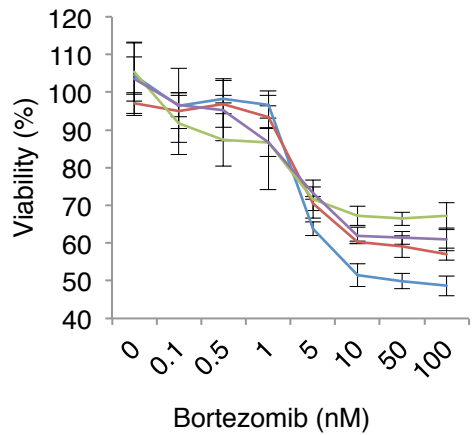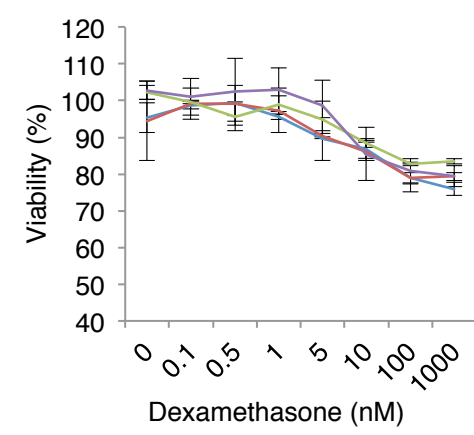

- sh\_LacZ
- sh\_p100 #1
- sh\_p100 #2
- sh\_p100 #4

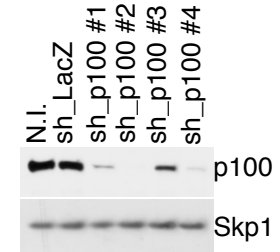



*FBXW7* may function as an oncogene or tumor suppressor depending on the genetic background of the cancer

---

*T-ALL*  
*CLL*  
*Colorectal Carcinoma*  
*Cholangiocarcinoma*  
*Gastric Carcinoma*  
*Endometrial Carcinoma*  
*Ovarian Carcinoma*

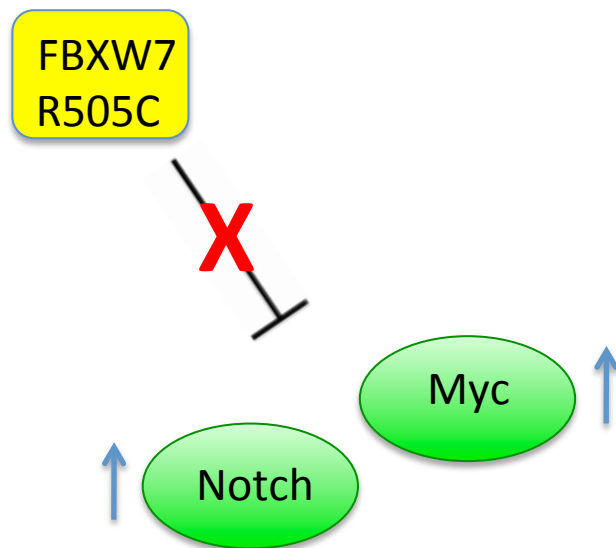

*Multiple Myeloma*  
*Diffuse large B-cell lymphoma*

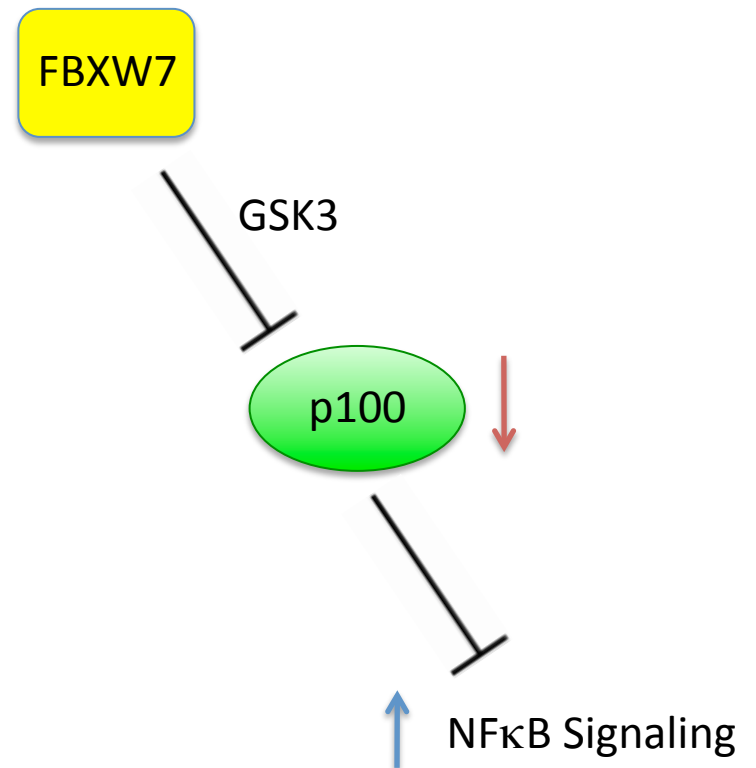

HHMI, NYU School of Medicine

Luca Busino

Scott Millman

Christos Kyratsous

Collaborators

K. Eletinoba-Johnson (U. of Michigan)

V. Basrur (U. of Michigan)

O. O'Connor & L. Scotto (Columbia)

A. Hoffman (UCSD)

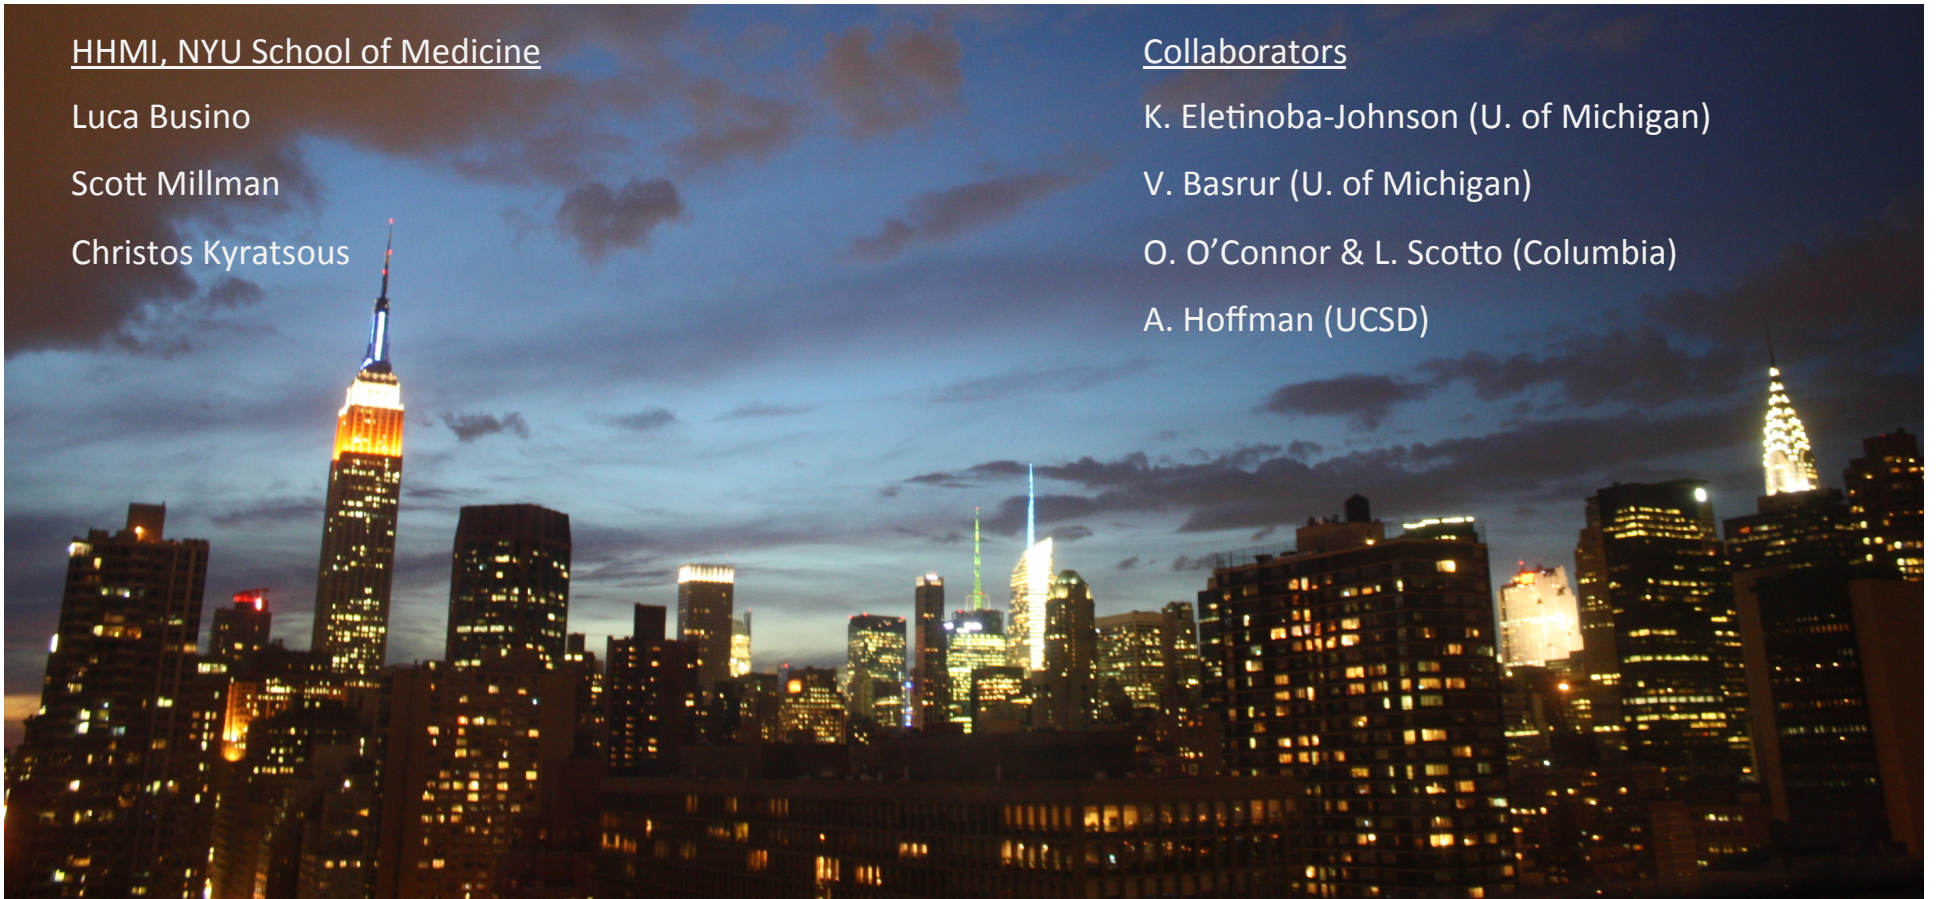

Supplement: NIHMS522893-supplement-01.pdf [file NIHMS522893-supplement-01.pdf]
